1 **Complex and long-range linkage disequilibrium and its relationship**  
2 **with QTL for Marek's Disease resistance in chicken populations**

3

4 **Ehud Lipkin<sup>1\*</sup>, Janet E. Fulton<sup>2</sup>, Jacqueline Smith<sup>3</sup>, David W. Burt<sup>3</sup> and Morris**  
5 **Soller<sup>1</sup>**

6

7 <sup>1</sup>Genetics, Hebrew University of Jerusalem, Jerusalem, Israel

8 <sup>2</sup>Hy-Line International, Dallas Center, IA 50063, USA

9 <sup>3</sup>The Roslin Institute and Royal (Dick) School of Veterinary Studies R(D)SVS,  
10 University of Edinburgh, Easter Bush, Midlothian EH25 9RG, UK

11 \*Corresponding author

12

13 **ABSTRACT**

14 Chicken long-range linkage disequilibrium (LRLD) and LD blocks, and their  
15 relationship with previously described Marek's Disease (MD) quantitative trait loci  
16 regions (QTLRs), were studied in an F<sub>6</sub> population from a full-sib advanced intercross  
17 line (FSAIL), and in eight commercial pure layer lines. Genome wide LRLD was studied  
18 in the F<sub>6</sub> population by random samples of non-syntenic and syntenic marker pairs  
19 genotyped by Affymetrix HD 600K SNP array. To illustrate the relationship with  
20 QTLRs, LRLD and LD blocks in and between the MD QTLRs were studied by all  
21 possible marker pairs of all array markers in the QTLRs, using the same F<sub>6</sub> QTLR  
22 genotypes and genotypes of the QTLR elements' markers in the eight lines used in the  
23 MD mapping study. LRLD was defined as  $r^2 \geq 0.7$  over a distance  $\geq 1$  Mb, and 1.5% of  
24 all syntenic marker pairs were classified as LRLD. Complex fragmented and  
25 interdigitated LD blocks were found, over distances ranging from a few hundred to a few  
26 million bases. Vast high, long-range, and complex LD was found between two of the MD  
27 QTLRs. Cross QTLRs STRING networks and gene interactions suggested possible  
28 origins of this exceptional QTLRs' LD. Thus, causative mutations can be located at a  
29 much larger distance from a significant marker than previously appreciated. LRLD range  
30 and LD block complexity may be used to identify mapping errors, and should be  
31 accounted for while interpreting genetic mapping studies. All sites with high LD with a  
32 significant marker should be considered as candidate for the causative mutation.

33

34 **Keywords:** Chicken; long-range linkage disequilibrium; QTL; F<sub>6</sub>; LD blocks

35

## 36 INTRODUCTION

37 Linkage disequilibrium (LD) refers to correlations among alleles of different genomic  
38 sites. It quantifies the informativity between different sites [Reich et al., 2001; Ardlie et  
39 al., 2002; Aerts et al., 2007]. Useful LD indicate non-random association of alleles at  
40 different loci [Aerts et al., 2007]. Appreciable LD is commonly found between pairs of  
41 loci close to one another, and LD decreases rapidly as distance between the loci increases  
42 [e.g., Aerts et al., 2007; García-Gómez et al., 2012]. This provides the basis for genome  
43 wide association studies (GWAS) to map quantitative trait loci (QTL).

44 Nevertheless, during any one-time snapshot of a population, long-range LD (LRLD)  
45 can also be found among loci that are well-separated from one another, over millions of  
46 bp [Aerts et al., 2007; Corbin et al., 2010; García-Gómez et al., 2012; Koch et al., 2013;  
47 Skelly et al, 2015; Park 2019; Peters et al., 2021]. Rarely, LD above background level  
48 can be found between non-syntenic markers on different chromosomes (chr) [García-  
49 Gómez et al., 2012].

50 LRLD could just be a matter of sampling variation, especially in small populations  
51 [Skelly et al, 2015]. Alternatively, LRLD could be a result of genome assembly errors  
52 where SNP locations are misidentified, and thus LRLD may help identify such assembly  
53 errors [Utsunomiya et al., 2016]. This phenomenon may, however, also have genuine  
54 biological origins, such as co-evolution of genomic sites (coding and non-coding genes,  
55 long- and short-range regulatory sites), gene conversion, copy number variation, or  
56 demographic factors such as selection, population bottlenecks, nonrandom mating, and  
57 epistasis.

58 LD blocks are runs of genomic sites all having appreciable LD with one another.  
59 However, high LD in general and LRLD in particular are not always continuous. Rather,  
60 they are often separated by genomic sites with which they have practically no LD [Allabi  
61 et al., 2005; Aerts et al., 2007; Lipkin et al., 2013; O'Brien et al., 2014]. Thus, not only  
62 can LD be found among distant loci, but also its pattern may be complex, comprised of  
63 fragmented blocks.

64 LRLD and LD complexity present concerns for GWAS mapping, as a significant  
65 association may be found between a causative locus and markers far removed from it, thus

66 falsely placing the putative causative locus at a site far away from its actual location  
67 [Skelly et al, 2015]. On the other hand, LRLD may point to interactions between  
68 unlinked regions in the genome (e.g., a receptor and its ligand or a gene and its regulator).  
69 Furthermore, LRLD can identify co-evolution of different genomic regions affected by  
70 the same selection, natural or artificial.

71 The objectives of this study were to characterize LRLD and LD blocks in multiple Hy-  
72 Line chicken lines previously used to map quantitative trait loci regions (QTLRs) for MD  
73 resistance [Smith et al., 2020]. This will give a genomic view of the LD complexity, and  
74 illustrate its importance to mapping results by assessing the relationship between LRLD  
75 and LD blocks and MD QTLRs.

76

## 77 **MATERIALS AND METHODS**

### 78 **Populations**

79 All procedures carried out on the birds involved in this study were conducted in  
80 compliance with Hy-Line International Institutional Animal Care and Use Committee  
81 guidelines.

82 Nine populations described by Smith et al. (2020) were again used in the present  
83 study. These comprised five families of F<sub>6</sub> birds from a Full Sib Advanced Intercross  
84 Line (FSAIL) used by Smith et al. (2020) to map QTLRs affecting MD resistance, and  
85 eight pure lines used in the same study to test these QTLRs.

86 A priori, it is expected that LRLD in F<sub>6</sub> will be at higher frequency than in pure lines,  
87 because the families start with only 4 chromosomes each, and there are only a few  
88 generation of intercrossing to break up the haplotype blocks. However, this study did not  
89 compare populations, families or lines. Rather, it aim to present the phenomena of LD  
90 long range and complexity.

### 91 **Trait**

92 The trait for which these QTLR are associated is resistance to the avian oncogenic  
93 alpha herpes virus, Marek's Disease (MD virus [Smith et al., 2020]). This trait association

94 data set was used, as the phenotype and genotype information was available. It is used as  
95 an illustration for the QTLR and LD associations that were identified.

## 96 **Genotypes**

97 Only the autosomal genotypes as used by Smith et al. (2020) to map and test QTLRs  
98 were used in the present study. Genotypes on the Z chromosome will be analyzed in  
99 detail in a different manuscript. Genotypes were obtained from the HD 600K Affymetrix  
100 SNP chicken array [Kranis et al., 2013] in the F<sub>6</sub> population, and marker genotypes used  
101 to test the QTLRs by the eight pure lines [Smith et al., 2020]. The only difference was  
102 that instead of a minimum  $MAF \geq 0.01$  used for the association tests by Smith et al.  
103 (2020), a threshold of 0.10 was used here for the LD analysis, to avoid spurious high LD  
104 due to rare alleles [Skelly et al., 2015]. However, to test LD with exactly the same  
105 markers used for association tests in the eight pure lines, the threshold of  $MAF \geq 0.01$   
106 was also used for LD for these lines.

## 107 **Genome assemblies and remapping QTLRs**

108 As described in Smith et al. (2020), the initial analysis in this study was based on the  
109 Galgal4 genome build. The [Lift Genome Annotations](#) tool [Haeussler et al., 2019] within  
110 the [UCSC](#) Browser was used to remap markers from Galgal4 to Galgal6 (GRCg6a; Acc.  
111 No.: GCA\_000002315.5). The new coordinates were then used to remap the F<sub>6</sub> QTLRs as  
112 was done by Smith et al. (2020). The results were very similar on both assemblies, and  
113 hence only the results from Galgal6 will be presented here. Nevertheless, there was one  
114 change worth noting, detailed in the Appendix.

## 115 **Linkage disequilibrium (LD)**

116 **LD Measure.** LD  $r^2$  within each F<sub>6</sub> family and each pure line were obtained using JMP  
117 Genomics software (JMP Genomics, Version 9, SAS Institute Inc., Cary, NC, USA,  
118 1989–2019).

119 **Non-syntenic LD.** Background LD over all autosomes was estimated utilizing  
120 Affymetrix 600K genotypes of two random combined samples with return of non-  
121 syntenic marker pairs from each of the five F<sub>6</sub> families.

122 **Long-Range LD (LRLD).** Koch et al. (2013) used all pairs of SNPs on each human  
123 chromosome and defined LRLD between haplotype-blocks rather than between SNP  
124 pairs. However, due to computer limitations, we used samples of random SNP pairs on  
125 the Affymetrix 600K SNP array to assess LRLD in the autosomes of the five F<sub>6</sub> families.  
126 Koch et al. (2013) defined LRLD in human as high LD (their low  $p_D$ ) over a distance  $\geq$   
127 0.25 cM ( $\approx$  0.25 Mb). Vallejo et al. (2018) used a very relaxed LD threshold of  $r^2 > 0.25$   
128 in rainbow trout studies, but a larger minimum distance of 1.0 Mb. Conservatively, and  
129 based on the present results, in this study we defined LRLD as a marker pair with  $r^2 \geq 0.7$   
130 over a distance  $\geq 1.0$  Mb. As noted in the Introduction, LRLD between elements in a  
131 QTLR and across QTLRs can indicate a relationship between the element and between  
132 the QTLRs. Hence, to illustrate its importance, LRLD in and between MD QTLRs [Smith  
133 et al., 2020] was studied by all F<sub>6</sub> Affymetrix genotypes in the QTLRs.

134 **F<sub>6</sub> random LRLD and QTLRs.** F<sub>6</sub> LRLD of random marker pairs were aligned by  
135 chromosomal location with the F<sub>6</sub> MD QTLRs [Smith et al., 2020], and all overlaps  
136 between the LRLDs and the QTLRs were counted.

137 **LD blocks.** High LD blocks were defined as a group of markers located on the same  
138 chromosome having  $r^2 \geq 0.7$  with each other. The definition was applied even if markers  
139 with low LD appeared between the LD markers. This definition allowed a "look over the  
140 horizon" and identification of fragmented and interdigitated blocks.

#### 141 **Gene network analysis**

142 To investigate the genes underlying QTLRs 4 and 5, the BioMart tool within the  
143 Ensembl database (<https://www.ensembl.org/info/data/biomart/index.html>) was used to  
144 identify genes in these regions. These identified genes were then subject to network  
145 analysis using the STRING database (v11). [Jensen et al., 2009] which provides an  
146 overview of known protein interactions.

147

## 148 **RESULTS**

149 **Remapping QTLRs from Galgal4 to Galgal6.** The new coordinates of the markers on  
150 Galgal6 and association results obtained by Smith et al. (2020) were used to remap the

151 MD QTLRs identified with Galgal4 by Smith et al. (2020). The same 38 QTLRs were  
152 found on each genome build (Table 1). Most changes were negligible, except one  
153 movement of a fragment on Chr 1 over about 70 Mb from QTLR 1 to QTLR 4, including  
154 a QTLR lncRNA tested by Smith et al. (2020). This change is detailed in the Appendix.  
155 The new QTLR coordinates on Galgal6 were used for the LD analyses in this study.

156

157 *Table 1. Remapping Galgal4 QTLRs onto Galgal6.*

158

### 159 **Linkage disequilibrium in the F<sub>6</sub> population based on 600K genotyping SNP array**

160 **Non-syntenic random LD.** A total of 923,183 random non-syntenic pairs of markers  
161 from different autosomes were used to assess the background level of LD, with an  
162 average of 184,636.6 pairs in a family (Table 2). LD averaged  $0.011 \pm 0.016$ , comparable  
163 to previous reports in chicken [Lipkin et al., 2013; Seo et al., 2018], but about ten times  
164 higher than values reported in mammals; horse [Corbin et al., 2010], sheep [García-  
165 Gámez et al., 2012], and cattle [Khatkar et al., 2008; Sargolzaei et al., 2008] populations.  
166 These differences may represent experimental design, or population sample, size, history  
167 and structure or biological differences between birds and mammals.

168 Mean family LDs and standard deviations (SDs) had significant high negative  
169 correlation with the size of the population sample (i.e., Ind/pair),  $r = -0.895$  ( $P = 0.040$ )  
170 and  $r = -0.884$  ( $P = 0.046$ ). These correlations are also in accord with our previous report  
171 in chicken [Lipkin et al., 2013], and the expectation of Sved (1971).

172

173 *Table 2. Summary statistics of non-syntenic random LD between 600K markers in the F<sub>6</sub>*  
174 *families.*

175

176 With a mean LD of  $0.011 \pm 0.016$ , any  $r^2 > 0.043$  is above the background LD. Indeed,  
177 combining all five F<sub>6</sub> families together, only 3.5% of the  $r^2$  values were above 0.05  
178 (Supplemental Table 1). A single high LD of  $r^2 = 0.991$  was found in Family 2. Without

179 any replication, this was treated as a sampling effect. Based on these results, a  
180 conservative critical LD value of  $r^2 \geq 0.15$  was chosen for defining significant LD.

181

182 *Supplemental Table 1. Distribution of non-syntenic random LD values among the  $F_6$*   
183 *families.*

184

185 **Syntenic random LD.** A total of 1,008,823 random syntenic marker pairs were used to  
186 assess the level of random LDs on the same chromosome (Table 3). Distance between  
187 markers in the random pairs varied from 11 to 197,038,449 bp, with an average of  
188 28,976,195.6 bp. Means of  $r^2$  were all in close range around 0.11, averaging 0.114, ten  
189 times the means obtained for the non-syntenic LD. Though obtained by random marker  
190 pairs, some of which are at a long distance from one another, these means suggest the  
191 presence of large number of LDs above the background LD of 0.011 (Table 2). The  
192 expected negative correlation between distance and LD was again obtained in all five  
193 families (Table 3).

194

195 *Table 3. Summary statistics of syntenic random LD between 600K markers in the  $F_6$*   
196 *families.*

197

198 In all families, about two-thirds of the LD values were up to 0.05, dropping rapidly  
199 thereafter (Table 4). Interesting, for all families, there was an increase in the range of  $r^2 >$   
200 0.85, suggesting existence of large high-LD blocks. Pooled over all families, the  
201 proportion of  $r^2 \geq 0.15$ , set conservatively as a threshold of significance by the non-  
202 syntenic LD, was almost 0.2 (Table 4), while less than 5% of the LD values were above  
203 0.7. Hence, the range of  $0.15 \leq r^2 < 0.7$  was set as low to moderate LD and used to define  
204 moderate LD blocks, and  $r^2 \geq 0.7$  was set as high LD and used to define LRLD and high  
205 LD blocks.

206



207 **Table 4.** *Distribution of syntenic random LD values among the F<sub>6</sub> families.*

208

209 **Long-range LD (LRLD)**

210 **Estimating LRLD by random samples of syntenic marker pairs.** Pooled over all  
211 families, 418,075 pairs had a distance above 20 Mb; as expected, no high LD of  $r^2 \geq 0.7$   
212 was found beyond 20 Mb (Supplemental Table 2).

213

214 **Supplemental Table 2.** *Distribution of distances among random marker pairs in the F<sub>6</sub>*  
215 *families.*

216

217 Detailed inspection of the distances up to 20 Mb showed that all high LDs were in fact  
218 within 10 Mb (Supplemental Table 3).

219

220 **Supplemental Table 3.** *Distribution of distances among random syntenic pairs with  $r^2 \geq$*   
221 *0.7 separated by up to 20 Mb in the F<sub>6</sub> families.*

222

223 Pooled over all families together, a total of 50,100 random marker pairs qualified  
224 within the LRLD definition, namely  $r^2 \geq 0.7$  over a distance  $\geq 1$  Mb. These LRLDs  
225 constitute 30.9% of all pairs within 20 Mb, and 1.5% of the total number of syntenic pairs  
226 tested (Supplemental Table 2).

227 Among the syntenic pairs, 0.016 had  $r^2 > 0.95$ , almost 15-times the proportion of the  
228 single LD value in this range (0.000001) found among the non-syntenic pairs  
229 (Supplemental Table 1). Thus, the proportion of syntenic high LD was not negligible.  
230 LRLDs were distributed over all autosomes in all five F<sub>6</sub> families (Supplemental Table 4,  
231 Figure 1; LD matrices in Genetics figshare portal). No LRLD was found on  
232 Chromosomes 22 in any of the families.

233

234 **Supplemental Table 4.** *Distribution of random LRLDs over autosomal chromosomes in*  
235 *the F<sub>6</sub> families.*

236

237 Though these LRLDs were obtained by random sampling of marker pairs, repeated  
238 similar locations of marker pairs suggest the existence of many LRLD blocks. This was  
239 indeed found by the LD analysis of the MD QTLRs (see below).

240

241 **F<sub>6</sub> MD QTLRs and random LRLD.** To check for a possible relationship between the  
242 LRLDs found here and the F<sub>6</sub> MD QTLRs mapped in the same population (Table 1),  
243 LRLDs and QTLRs were aligned together (e.g., Figure 1 and LD matrices in Genetics  
244 figshare portal), and overlaps were counted (Supplemental Table 5).

245

246 **Figure 1.** *Distribution of random LRLDs over Chr 1 and overlaps with QTLRs (Table 1)*  
247 *in F<sub>6</sub> Family 1.*

248

249 **Supplemental Table 5.** *Number of random F<sub>6</sub> LRLDs overlapping F<sub>6</sub> MD QTLRs.*

250

251 As noted above, with all markers in an interval less than 1 Mb, no LRLD could be  
252 found on Chr 16 (Supplemental Table 4); hence, QTLR 32 was not included in any  
253 further analyses. Of the remaining 37 QTLRs, overlaps between 28 QTLRs and LRLDs  
254 were found in all families (the non-zeros under ‘Families’ in Supplemental Table 5). It  
255 seems remarkable that, even though only 1.5% of the random LD values were LDLR, no  
256 less than 75.7% of the mapped MD QTLRs overlapped LRLDs. Then again, in Galgal6,  
257 QTLRs averaged 1.4 Mb (Table 1), and random LRLDs averaged 2.2 Mb, from 1 to  
258 above 12 Mb (Supplemental Table 6). Thus, such overlap may not be so surprising, but a  
259 result of the abundance and size of the QTLRs and LRLDs.

260

261 **Supplemental Table 6.** *The distribution of random F<sub>6</sub> LRLDs length.*

262

263       Zooming in on QTLRs clearly showed the overlap between the LRLDs and QTLRs  
264 (Figure 2). Not only was LRLD found within QTLRs, but LRLD was found between  
265 QTLRs 4 and 5 in all 5 families. The similar locations seen in Figure 2 suggest the  
266 presence of LD blocks shared by both QTLRs.

267

268 **Figure 2.** *Overlaps between QTLRs 4-5 and LRLDs in all F<sub>6</sub> families.*

269

### 270 **LD in the QTLRs in the F<sub>6</sub> families**

271       The overlaps found in the F<sub>6</sub> families between random LRLDs and the MD QTLRs,  
272 led us to examine in more detail the LRLD and LD blocks in these QTLRs, with all  
273 informative markers of the five F<sub>6</sub> families (note that this part used *all* pairs of  
274 informative markers in the QTLRs, and not only a *sample* of random pairs as in the first  
275 LD analysis).

276       Chromosomes 1, 2, 4, 5, 6 and 14, harbored more than one QTLR (Table 1), thus  
277 enabling examination of LD in and between QTLRs. In each F<sub>6</sub> family, Affymetrix SNP  
278 array genotypes were used to calculate LD between all possible pairs of all markers in the  
279 21 QTLRs on those chromosomes.

280       Hundreds of thousands of LRLDs were found in and between the tested QTLRs  
281 (Supplemental Table 7). Total number of marker pairs ranged from below 8 to above 10  
282 million in a family, to a total of more than 43 million pairs. Of these, pooled over all  
283 families, 830,182 were LRLDs (62,103 - 227,015 LRLDs in a family). These constitute  
284 0.7 - 2.6% of all pairs in a family, a total of 1.9%, higher than the 1.5% found among the  
285 random pairs over all autosomes (Supplemental Table 3).

286       A total of 161,832 LRLDs were found between QTLRs (Supplemental Table 7),  
287 19.5% of all LRLDs found (0.6 - 24.9 % among the families).

288       Family 5 is an outlier in Supplemental Table 7, with a much lower number and  
289 proportion of total LRLDs and LRLDs across QTLRs compared to the other four

290 families. Further inspection did not identify any source of this difference. Hence, we have  
291 no explanation other than sampling variation.

292

293 *Supplemental Table 7. Number of pairs and sum of QTLR LRLDs.*

294

295 Pooling all families together, LRLDs were found in all 6 chromosomes examined  
296 (Table 5). No LRLD could be found *in* the QTLRs on Chromosomes 5 or 6 (Table 5), as  
297 no QTLR there was larger than 1 Mb (Table 1). However, LRLDs *between* QTLRs were  
298 also found in those two chromosomes.

299

300 *Table 5. Chromosomes and LRLDs in and between QTLRs.*

301

302 In all families, LRLDs were found between most pairs of QTLRs (Supplemental Table  
303 8 a-f). Exceptional among all pairs of QTLRs, an extremely large number of LRLDs  
304 (159,413) was found between QTLRs 4 and 5 on Chr 1 in all families, confirming the  
305 results of the random samples (Figure 2). The tight LD between these two QTLRs was  
306 further confirmed by the LD blocks (below).

307

308 *Supplemental Table 8. Number of arrays F<sub>6</sub> LRLDs in and between QTLRs in all*  
309 *families.*

310

311 Thus, repeating in all F<sub>6</sub> families, LRLDs were found to be frequent, distributing  
312 within and between QTLRs in all chromosomes tested.

313

314 **QTLR LD blocks**

315 **LD Blocks in the F<sub>6</sub> QTLR**

316 As shown by the data a complicated LD pattern was found in the F<sub>6</sub> QTLR. Large,

317 fragmented, and interdigitated LD blocks were found in all five families over all six  
318 chromosomes examined (LD matrices in Genetics figshare portal). The range and  
319 complexity would have been even larger if moderate LD blocks were included, with  $0.15$   
320  $\leq r^2 < 0.7$ .

321 An example of fragmented interdigitated blocks is presented in Figure 3a. Close  
322 examination of the LD found in Family 1 in this region shows the presence of 3 high LD  
323 blocks, all fragmented and all interdigitated with one another: Block 1 includes markers  
324 with ID numbers 134-141, 143, 145-149, and 151; Block 2 includes markers 142, 144  
325 and 152; Block 3 includes markers 150 and 337. The fact that, despite their apparent  
326 fragmentation, these are indeed genuine blocks is shown in Figures 3 c-d. If the markers  
327 in Blocks 2 and 3 were not included in the analysis, (e.g., because they were not on the  
328 SNP array or were filtered out by the quality control or were not polymorphic in this  
329 family), then three clear unambiguous blocks would have been identified.

330 Note the distance between the markers in block 3, is above 0.5 Mb. Should the  
331 criterion of 0.25 Mb [Koch et al., 2013] been used, this block would be defined as LRLD.  
332

333 **Figure 3.** *Fragmented interdigitated blocks in QTLR2 on chr 1 found in F<sub>6</sub> Family 1.*

334

335 **Blocks shared by QTLRs 4 and 5 in the F<sub>6</sub> families.** In accordance with the random  
336 sampling of marker pairs and LRLDs in and between QTLRs in the F<sub>6</sub>, large and long-  
337 range LD blocks were shared by QTLRs 4 and 5 in all five families, as exemplified in  
338 Supplemental Figure 1 and detailed in Supplemental Tables 8 a-f. In Supplemental Figure  
339 1, the high LD block distributed from the first marker of QTLR 4 to close to the end of  
340 QTLR 5, over 5.7 Mb, with 412 markers included. Considering moderate LD of  $0.15 \leq r^2$   
341  $< 0.7$ , would stretch the block all the way to the end of QTLR 5, over more than 7.1 Mb.  
342 Thus, the exceptional LD between QTLRs 4 and 5 indicated by the random sample of  
343 pairs was confirmed in all F<sub>6</sub> families by both LRLDs and LD blocks between QTLRs.

344

345 **Supplemental Figure 1.** *LD blocks shared by QTLRs 4 and 5 in Family 2.*

346

#### 347 **LD among QTLR elements in the eight pure lines**

348 LD of elements within and between the F<sub>6</sub> QTLRs was further examined within eight  
349 Hy-Line elite pure lines. Complex LD blocks between elements within and across  
350 QTLRs were found, similar to that found in the F<sub>6</sub> families, over distances from a few bp  
351 to a few Mb (Figure 4-6; all LD matrices are in Genetics figshare portal).

352 **LD within one QTLR gene.** Figure 4 present an example of LD blocks within the QTLR  
353 gene *TRANK1* in Line WL1. Despite the short distances (390 bp to 14.5 Kb), a complex  
354 pattern was found, with 2 LD blocks, one of which is fragmented around the other. There  
355 was high to complete LD between markers 5, 8 and 13-36. These markers had practically  
356 no LD with markers 11 and 12, which were in complete LD with one another. Thus, in  
357 the gene *TRANK1* in Line WL1, Block 1 starts before, but ends after Block 2. The  
358 association test P values [Smith et al., 2020] completely matched the LD blocks, with the  
359 same or close P values in each block. This match was found in all other combinations of  
360 QTLR - line (Figures 5 - 7).

361

362 *Figure 4. LD within one QTLR gene.*

363

364 **LD between QTLR elements.** An example of a more complex LD pattern with  
365 interdigitated blocks is shown in Figure 5, this time across QTLR elements (3 lncRNAs).

366

367 *Figure 5. LD blocks across QTLR elements.*

368

369 Careful inspection of Figure 5 shows 2 interdigitated blocks: Block 1 includes  
370 Markers 6-8, 15, and 19-20; Block 2 comprise of Markers 11-14, 16-17 and 30-33. Thus,  
371 the high LD Block extend over the 3 QTLR lncRNAs. The middle lncRNA05 is split  
372 among the 2 blocks. Some of the markers are in LD with upstream lncRNA02, while  
373 other markers of the same lncRNA05 form a block with the downstream lncRNA02. The

374 2 groups of lncRNA05 are interdigitated. That is, Markers 6-8 of lncRNA02 are in the  
375 same block with 2 separate regions in the next lncRNA05 - Markers 15 and then 19-20  
376 but not with the other markers in the same lncRNA; Markers 12-14 and 19-20 of  
377 lncRNA05 are in LD with all 4 markers of lncRNA04. It would be interesting to find out  
378 what are the sources of such complex LD patterns.

379 LD was found between other types of QTLR elements as well. Figure 6 present such  
380 LD between the QTLR genes *TLR4* and *BRINP1* in QTLR 33 on Chr 17. The first marker  
381 of *TLR4* has high LD to the first 2 markers of *BRINP1*, and the 3 markers are not linked  
382 to other markers of their own gene. The other 6 markers of *TLR4* form a tight LD block.  
383 Complexing it even further, the last marker of *BRINP1* (Marker 15) had low to moderate  
384 LD with all markers in QTLR 33, both genes included.

385

386 **Figure 6.** LD between QTLR genes.

387

388 **LD between QTLRs 4 and 5.** Markers on both QTLRs 4 and 5 were informative only in  
389 Lines WL3, WPR1, WPR2, and RIR1, up to only 4 markers in a line in QTLR 4 (Lines'  
390 LD matrices in Genetics figshare portal). Thus, information on the LD between the  
391 QTLRs was limited in this dataset. Nevertheless, in accord with the random LDs in the F<sub>6</sub>  
392 families (Figures 1 and 2) and cross QTLRs LRLD in these families (Supplemental  
393 Tables 8 b-f), moderate LD blocks among elements in these QTLRs crossed their  
394 boundaries in Lines WPR1, WPR2 and RIR1. In Line WRP1, 2 clear high LD blocks  
395 were found, one in each QTLR (Figure 7). However, the 2 QTLR blocks had moderate  
396 LDs of  $r^2 = 0.478$  among them, thus forming one moderate LD block. Note that the  
397 distances between the cross QTLR pairs, varied from 5.135 to 5.138 Mb.

398

399 **Figure 7.** LD between QTLRs 4 and 5 in a pure line.

400

401 Looking for a source of such vast, high, and complex long-range LD between QTLRs  
402 4 and 5, a bioinformatics search found 10 and 68 genes in QTLRs 4 and 5, respectively

403 (Figure 8 and Table 6). STRING network analysis revealed five networks of 2 to 28  
404 genes. Two of the networks ('Net' 2 and 3 in Table 6), are comprised of genes from both  
405 QTLRs (Figure 8 and Table 6). Of 'Net' 2, the 2 genes in QTLR 4 and 17 of the 26 genes  
406 in QTLR 5 are located in the LD blocks extending over the two QTLRs found in F<sub>6</sub> ('+' in  
407 the column 'B4-5' in Table 6). Both genes in 'Net' 3 are in those blocks. Finally, the two  
408 networks with genes from both QTLRs included 6 genes interacting with a gene from  
409 another QTLR (Figure 8), all of which located in the cross QTLRs LD blocks. The gene  
410 networks and interactions shared by both QTLRs could be the origin of the LD between  
411 QTLRs 4 and 5. In fact, the phenomenon of genes whose products work together tending  
412 to be on the same chromosomal region is quite common. For example, the Major  
413 Histocompatibility Complex (MHC) on chicken chromosome 16 and the Regulators of  
414 Complement Activation cluster (RCA) on chromosome 26 [Oshiumi et al, 2005;  
415 Hosomichi et al, 2008; Michilak, 2008]. In fact, the networks presented in Figure 8 is a  
416 good examples for this colocation of genes working together.

417

418 **Table 6.** *Genes and protein networks in QTLRs 4 and 5.*

419

## 420 **DISCUSSION**

421 Chicken LD over a range of distances, and patterns of LD blocks, were studied in five  
422 F<sub>6</sub> families from a FSAIL, and eight commercial pure layer lines, thus allowing to study  
423 the repetition of the results. LRLD was studied in the F<sub>6</sub> population by random non-  
424 syntenic and syntenic samples of marker pairs genotyped by the Affymetrix HD SNP  
425 array. In face of the LRLD results, and to illustrate the importance of LRLD to QTL  
426 mapping results, LRLD and LD blocks were studied with all possible marker pairs of all  
427 markers in previously described MD QTLRs [Smith et al., 2020].

428 This study started with SNP location information from the previous chicken genome  
429 build Galgal4, and was subsequently updated to the Galgal6 assembly. This change  
430 necessitated remapping of the QTLRs described in Smith et al. (2020), resulting in  
431 negligible changes of most QTLR coordinates. Nevertheless, the change of genome



432 versions moved a segment of Galgal4 QTLR 1 (chr 1) to Galgal6 QTLR 4 (chr 1)  
433 (Appendix). The moved segment included one QTLR lncRNA described in Smith et al.  
434 (2020), thus emphasizing the importance of basing genomic analyses on the most updated  
435 genome version. These results also present the power of LD to identify mapping errors,  
436 as already noted by Utsunomiya et al. (2016).

437 Long-range LD (LRLD) was defined as  $r^2 \geq 0.7$  over a distance  $\geq 1$  Mb. These criteria  
438 are more restricted than previously used [Koch et al., 2013; Vallejo et al., 2018].  
439 Nevertheless, repeated appreciable numbers of LRLDs within chromosomes were found  
440 repeated in all five F<sub>6</sub> families by the random sampling of syntenic marker pairs, far  
441 above the numbers of high LD found between non-syntenic markers from different  
442 chromosomes. The LRLDs were further found in all five F<sub>6</sub> families by all QTLR array  
443 markers on chromosomes with more than one QTLR. These results could be an  
444 underestimate, as the F<sub>6</sub> population was designed to fragment the genome for high-  
445 resolution QTL mapping [Heifetz et al. 2007, 2009].

446 High LD blocks were defined as a group of markers located on the same chromosome,  
447 having  $r^2 \geq 0.7$  with each other, even if markers with low LD appeared between them.  
448 This definition allowed "a look over the horizon" and identification of complex blocks.  
449 The phenomenon of fragmented and interdigitated LD blocks were repeatedly found in  
450 all five F<sub>6</sub> families and in all eight pure lines over a vast range of distances, from  
451 hundreds of bp to mega bases. The FSAIL population was composed of five families, and  
452 they showed similar results. Strength of this analysis was that it repeated five times. Then  
453 the same phenomenon was seen in the eight elite lines, further adding strength to the  
454 validity of these results, which also agree with previous studies from us and others [e.g.,  
455 Aerts et al., 2007; Allabi et al., 2005; Lipkin et al., 2013; O'Brien et al., 2014].

456 A strong linkage was found between QTLRs 4 and 5. LRLD between them was found  
457 while analyzing the F<sub>6</sub> random samples of SNPs within all autosomes. High LD blocks  
458 were found in all five F<sub>6</sub> families, comprised of markers from both QTLRs. Moderate LD  
459 blocks between QTLRs 4 and 5 were also found in 3 of the 8 pure lines by QTLR  
460 elements' markers. These results raise the question of what elements on both QTLRs are  
461 in high LD over such large distances. Of course, being MD QTLRs, the LD between the

462 QTLRs could be a result of a co-selection for MD resistance. But what make these two  
463 QTLRs so different from all other pairs of QTLRs? Why is their LD so exceptional?

464 To answer this, we looked at the gene content of QTLRs 4 and 5. Ten and 68 genes  
465 were found in QTLRs 4 and 5, respectively. STRING protein network analysis revealed  
466 five gene networks. Two of the networks include genes from both QTLRs, most of which  
467 are located within the LD blocks extending over the two QTLRs found in the F<sub>6</sub>. All 6  
468 genes interacting with a gene from another QTLR are in the cross QTLRs LD blocks.  
469 Obviously, the shared gene networks and interactions could be the origin of the LD  
470 between QTLRs 4 and 5. However, assessing the uniqueness of the LD between the  
471 QTLRs necessitates further study on the distribution of cross QTLR networks and  
472 interactions among other pairs of QTLRs with less LD among them. Furthermore,  
473 assessing the real effect of the gene networks and interactions needs more molecular,  
474 quantitative and population studies. All of these are beyond the scope of the present  
475 study.

476 In general, the complex LD found in this study could stem from technical reasons such  
477 as sampling variation. It can also be a result of mapping errors, as was indeed found in  
478 this study for regions on chromosome 1 with build 4 (Appendix). However, it could have  
479 genuine biological meaning, through processes such as co-evolution of genomic sites (as  
480 a result natural or artificial selection), gene conversion, copy number variation,  
481 population bottlenecks, non-random mating, and epistasis. The repeatability in different  
482 analyses, different datasets and different populations, and the agreement with previous  
483 reports strengthen the case for the present results as being a genuine biological  
484 phenomenon.

485 The observation of both LRLD and fragmented interdigitated blocks imply that the  
486 causative element is not necessarily the closest, or even close at all to the significant  
487 marker, and maybe not even to the significant block of markers. Thus, mapping results  
488 and searches for causative elements should be taken with caution, by considering the  
489 complexity of the LD. All sites with high LD with a significant marker are in effect  
490 candidates to be the causative element.

491

492 **Funding:** This work was supported by the Biotechnology and Biological Sciences  
493 Research Council (grant number BB/K006916/1).

494

495 **Availability of Data:** Data have been submitted to the European Nucleotide Archive  
496 (ENA) at EMBL-EBI under study accession numbers PRJEB39142 (WGS) and  
497 PRJEB39361 (RNAseq). LD matrices are available at figshare.

498

## 499 REFERENCES

- 500 1. Aerts J, Megens HJ, Veenendaal T, Ovcharenko I, Crooijmans R, Gordon L, Stubbs  
501 L, Groenen M. Extent of linkage disequilibrium in chicken. *Cytogenet Genome Res.*  
502 2007;117(1-4):338-45. doi: 10.1159/000103196. PMID: 17675876.
- 503 2. Allabi AC, Horsmans Y, Issaoui B, Gala JL. Single nucleotide polymorphisms of  
504 ABCB1 (MDR1) gene and distinct haplotype profile in a West Black African  
505 population. *Eur J Clin Pharmacol.* 2005 Apr;61(2):97-102.
- 506 3. Ardlie, K., Kruglyak, L. & Seielstad, M. Patterns of linkage disequilibrium in the  
507 human genome. *Nat Rev Genet* **3**, 299–309 (2002). <https://doi.org/10.1038/nrg777>.
- 508 4. Corbin LJ, Blott SC, Swinburne JE, Vaudin M, Bishop SC, Woolliams JA. Linkage  
509 disequilibrium and historical effective population size in the Thoroughbred horse.  
510 *Anim Genet.* 2010 Dec;41 Suppl 2:8-15. doi: 10.1111/j.1365-2052.2010.02092.x.  
511 PMID: 21070270.
- 512 5. García-Gómez, E., Sahana, G., Gutiérrez-Gil, B., & Arranz, J. J. (2012). Linkage  
513 disequilibrium and inbreeding estimation in Spanish Churra sheep. *BMC genetics*, *13*,  
514 43. <https://doi.org/10.1186/1471-2156-13-43>.
- 515 6. Haeussler M, Zweig AS, Tyner C, Speir ML, Rosenbloom KR, Raney BJ, Lee CM,  
516 Lee BT, Hinrichs AS, Gonzalez JN, Gibson D, Diekhans M, Clawson H, Casper J,  
517 Barber GP, Haussler D, Kuhn RM, Kent WJ. [The UCSC Genome Browser](#)  
518 [database: 2019 update](#). *Nucleic Acids Res.* 2019 Jan 8;47(D1):D853-D858.  
519 PMID: [30407534](#); PMC: [PMC6323953](#)
- 520 7. Heifetz, E.M.; Fulton, J.E.; O’Sullivan, N.P.; Arthur, J.A.; Wang, J.; Dekkers, J.C.;

- 521 Soller, M. Mapping quantitative trait loci affecting susceptibility to Marek's disease  
522 virus in a backcross population of layer chickens. *Genetics* **2007**, *177*, 2417–2431.  
523 [[CrossRef](#)] [[PubMed](#)]
- 524 8. Heifetz, E.M.; Fulton, J.E.; O'Sullivan, N.P.; Arthur, J.; Cheng, H.; Wang, J.; Soller,  
525 M.; Dekkers, J.C.M. Mapping QTL affecting resistance to Marek's disease in an F6  
526 advanced intercross population of commercial layer chickens. *BMC Genom.* **2009**,  
527 *10*, 20. [[CrossRef](#)]
- 528 9. Hosomichi K, Miller MM, Goto RM, Wang Y, Suzuki S, Kulski JK, Nishibori M,  
529 Inoko H, Hanzawa K, Shiina T. Contribution of mutation, recombination, and gene  
530 conversion to chicken MHC-B haplotype diversity. *J Immunol.* 2008 Sep  
531 1;181(5):3393-9. doi: 10.4049/jimmunol.181.5.3393. Erratum in: *J Immunol.* 2010  
532 May 1;184(9):5415. PMID: 18714011; PMCID: PMC2657362.
- 533 10. Jensen LJ, Kuhn M, Stark M, Chaffron S, Creevey C, Muller J, Doerks T, Julien P,  
534 Roth A, Simonovic M, Bork P, von Mering C. STRING 8--a global view on proteins  
535 and their functional interactions in 630 organisms. *Nucleic Acids Res.* 2009  
536 Jan;37(Database issue):D412-6. doi: 10.1093/nar/gkn760. Epub 2008 Oct 21. PMID:  
537 18940858; PMCID: PMC2686466.
- 538 11. Khatkar, M.S., Nicholas, F.W., Collins, A.R. *et al.* Extent of genome-wide linkage  
539 disequilibrium in Australian Holstein-Friesian cattle based on a high-density SNP  
540 panel. *BMC Genomics* **9**, 187 (2008). <https://doi.org/10.1186/1471-2164-9-187>.
- 541 12. Koch E, Ristroph M, Kirkpatrick M (2013) Long Range Linkage Disequilibrium  
542 across the Human Genome. *PLoS ONE* 8(12): e80754.  
543 <https://doi.org/10.1371/journal.pone.0080754>.
- 544 13. Kranis, A.; Gheyas, A.A.; Boschiero, C.; Turner, F.; Yu, L.; Smith, S.; Talbot, R.;  
545 Pirani, A.; Brew, F.; Kaiser, P.; et al. Development of a high density 600K SNP  
546 genotyping array for chicken. *BMC Genom.* **2013**, *14*, 59. [[CrossRef](#)]
- 547 14. Ehud Lipkin, Marlies Dolezal, Alessandro Bagnato, Janet Fulton, Petek  
548 Settar, Jesus Arango, Neil O'Sullivan, Attilio Rossoni, Theo Meuwissen,  
549 Kellie Watson, Morris Soller. 2013. Linkage Disequilibrium and Haplotype  
550 Blocks in Cattle and Chicken Populations. *Proceedings of the Plant &*

- 551 Animal Genomes XXI Conference, San Diego USA, P0680: Genome  
552 Mapping, Tagging & Characterization: General Comparative.
- 553 15. Michalak P. Coexpression, coregulation, and cofunctionality of  
554 neighboring genes in eukaryotic genomes. *Genomics*. 2008 Mar;91(3):243-  
555 8. doi: 10.1016/j.ygeno.2007.11.002. Epub 2007 Dec 21. PMID: 18082363.
- 556 16. Pérez O'Brien, A.M., Utsunomiya, Y.T., Mészáros, G. et al. Assessing  
557 signatures of selection through variation in linkage disequilibrium between  
558 taurine and indicine cattle. *Genet Sel Evol* 46, 19 (2014).  
559 <https://doi.org/10.1186/1297-9686-46-19>.
- 560 17. Oshiumi H, Shida K, Goitsuka R, Kimura Y, Katoh J, Ohba S, Tamaki Y,  
561 Hattori T, Yamada N, Inoue N, Matsumoto M, Mizuno S, Seya T.  
562 Regulator of complement activation (RCA) locus in chicken: identification  
563 of chicken RCA gene cluster and functional RCA proteins. *J Immunol*.  
564 2005 Aug 1;175(3):1724-34. doi: 10.4049/jimmunol.175.3.1724. PMID:  
565 16034113.
- 566 18. Park, L. Population-specific long-range linkage disequilibrium in the human genome  
567 and its influence on identifying common disease variants. *Sci Rep* **9**, 11380 (2019).  
568 <https://doi.org/10.1038/s41598-019-47832-y>.
- 569 19. Peters SO, Kızılkaya K, Ibeagha-Awemu EM, Sinecen M, Zhao X. Comparative  
570 accuracies of genetic values predicted for economically important milk traits,  
571 genome-wide association, and linkage disequilibrium patterns of Canadian Holstein  
572 cows. *Journal of Dairy Science*. 2021 Feb;104(2):1900-1916. DOI: 10.3168/jds.2020-  
573 18489.
- 574 20. Reich, D., Cargill, M., Bolk, S. *et al*. Linkage disequilibrium in the human  
575 genome. *Nature* **411**, 199–204 (2001). <https://doi.org/10.1038/35075590>.
- 576 21. M. Sargolzaei, F.S. Schenkel, G.B. Jansen, L.R. Schaeffer, Extent of Linkage  
577 Disequilibrium in Holstein Cattle in North America, *Journal of Dairy Science* 91,  
578 Issue 5, 2008, Pages 2106-2117, ISSN 0022-0302, [https://doi.org/10.3168/jds.2007-](https://doi.org/10.3168/jds.2007-0553)  
579 [0553](https://doi.org/10.3168/jds.2007-0553).

- 580 22. Seo D, Lee DH, Choi N, Sudrajad P, Lee SH, Lee JH. Estimation of linkage  
581 disequilibrium and analysis of genetic diversity in Korean chicken lines. *PLoS One*.  
582 2018 Feb 9;13(2):e0192063. doi: 10.1371/journal.pone.0192063. PMID: 29425208;  
583 PMCID: PMC5806858.
- 584 23. Skelly, D. A., Magwene, P. M., & Stone, E. A. (2016). Sporadic, Global Linkage  
585 Disequilibrium Between Unlinked Segregating Sites. *Genetics*, 202(2), 427–437.  
586 <https://doi.org/10.1534/genetics.115.177816>.
- 587 24. Smith, J.; Lipkin, E.; Soller, M.; Fulton, J.E.; Burt, D.W. Mapping QTL Associated  
588 with Resistance to Avian Oncogenic Marek’s Disease Virus (MDV) Reveals Major  
589 Candidate Genes and Variants. *Genes* 2020, 11,  
590 1019. <https://doi.org/10.3390/genes11091019>.
- 591 25. Sved J.A. (1971) Linkage disequilibrium and homozygosity of chromosome segments  
592 in finite populations. *Theoretical Population Biology* 2, 125–41.
- 593 26. Utsunomiya, A.T.H., Santos, D.J.A., Boison, S.A. et al. Revealing misassembled  
594 segments in the bovine reference genome by high resolution linkage disequilibrium  
595 scan. *BMC Genomics* 17, 705 (2016). <https://doi.org/10.1186/s12864-016-3049-8>.
- 596 27. Roger L. Vallejo, Rafael M. O. Silva, Jason P. Evenhuis, Guangtu Gao, Sixin Liu,  
597 James E. Parsons, Kyle E. Martin, Gregory D. Wiens, Daniela A. L. Lourenco,  
598 Timothy D. Leeds, Yniv Palti. Accurate genomic predictions for BCWD resistance in  
599 rainbow trout are achieved using low-density SNP panels: Evidence that long-range  
600 LD is a major contributing factor. *J Anim Breed Genet*. 2018; 135(4):263–74.  
601 <https://doi.org/10.1111/jbg.12335>.

602

603

## APPENDIX - Genome assemblies

604

As stated in the Methods, this analysis started based on the Galgal4 genomic build.

605

Then [Lift Genome Annotations](#) tool [Haeussler et al., 2019] of [UCSC](#) Browser was used

606

to move from Galgal4 to Galgal6 (GRCg6a). The new coordinates were then used to

607

redefine the F<sub>6</sub> QTLRs as was done by Smith et al. (2020). The same LD analyses were

608

carried on both assemblies, results were similar, and hence only the results on Galgal6 are

609

presented in the body of the paper. Nevertheless, there was one change worthy of note,

610

and here we show the effect of updating the genome build (moving from Galgal4 to

611

Galgal6), and thus the ability to locate assembly errors by LD.

612

Using *Galgal4*, almost all high syntenic LDs of  $r^2 \geq 0.7$  were below 20 Mb, as

613

expected (Appendix Table 1).

614

**Appendix Table 1. Galgal4.** Distance distribution of high LD syntenic marker pairs

615

randomized within chromosomes.

| Distance (Mb)                        | Fam1     | Fam2     | Fam3     | Fam4     | Fam5     | All       |
|--------------------------------------|----------|----------|----------|----------|----------|-----------|
| $\geq 20$                            | 10,710   | 9,792    | 9,740    | 9,986    | 10,193   | 50,421    |
| >20 - $\geq 30$                      | 0        | 0        | 0        | 0        | 0        | 0         |
| >30 - $\geq 40$                      | 0        | 0        | 0        | 0        | 0        | 0         |
| >40 - $\geq 50$                      | 0        | 0        | 0        | 0        | 0        | 0         |
| >50 - $\geq 60$                      | 0        | 0        | 0        | 0        | 0        | 0         |
| <b>&gt;60 - <math>\geq 70</math></b> | <b>1</b> | <b>3</b> | <b>4</b> | <b>3</b> | <b>2</b> | <b>13</b> |
| >70 - $\geq 80$                      | 0        | 0        | 0        | 0        | 0        | 0         |
| >80 - $\geq 90$                      | 0        | 0        | 0        | 0        | 0        | 0         |
| >90 - $\geq 100$                     | 0        | 0        | 0        | 0        | 0        | 0         |
| >100 - $\geq 110$                    | 0        | 0        | 0        | 0        | 0        | 0         |
| >110 - $\geq 120$                    | 0        | 0        | 0        | 0        | 0        | 0         |
| >120 - $\geq 130$                    | 0        | 0        | 0        | 0        | 0        | 0         |
| >130 - $\geq 140$                    | 0        | 0        | 0        | 0        | 0        | 0         |
| >140 - $\geq 150$                    | 0        | 0        | 0        | 0        | 0        | 0         |
| >150 - $\geq 160$                    | 0        | 0        | 0        | 0        | 0        | 0         |
| >160 - $\geq 170$                    | 0        | 0        | 0        | 0        | 0        | 0         |
| >170 - $\geq 180$                    | 0        | 0        | 0        | 0        | 0        | 0         |
| >180 - $\geq 190$                    | 0        | 0        | 0        | 0        | 0        | 0         |
| >190 - $\geq 200$                    | 0        | 0        | 0        | 0        | 0        | 0         |
| Sum                                  | 10,711   | 9,795    | 9,744    | 9,989    | 10,195   | 50,434    |

616

617

Unexpectedly, in all 5 families few high LDs were found with distances from above

618

60 to 70 Mb (bolded in Appendix Table 1). This was the only interval with high LD

619 above 20 Mb. Detail examination of those 13 extreme long range LDs (LRLDs), showed  
 620 that all markers in these very distant pairs involved the same 3 regions on chromosome 1.  
 621 Intriguing, all markers were within or very close to 3 of Smith et al. (2020) F<sub>6</sub> MD QTL  
 622 regions (QTLRs). In each pair, one marker was from QTLR 1, the other from QTLRs 4  
 623 or 5. Although these 3 QTLRs were significant only in Family 3, the extreme LRLDs  
 624 were found in all 5 families.

625 In the face of these results, we LD together all three regions involved (regions of the  
 626 markers in the 13 LDLRs, not the entire QTLR). As presented in the body of the paper  
 627 for Galgal6, a very complex LD pattern was obtain in Family 1. A representative example  
 628 is presented in Appendix Figure 1. The entire matrix of 540 SNPs is too large to present,  
 629 hence only a sample of markers is presented the give general impression of the LD  
 630 pattern obtained.

631 **Appendix Figure 1. Galgal4.** Representative matrix in Family 1 of the 3 regions with  
 632 markers from LRLDs > 60 Mb. These regions are parts of QTLRs 1, 4 and 5. Yellowed  
 633 on the flanks, QTLRs 1 and 5, with the white QTLR 4 between them; blue frame, a  
 634 QTLR; Red,  $r^2 \geq 0.7$ ; purple,  $0.15 < r^2 < 0.7$ .

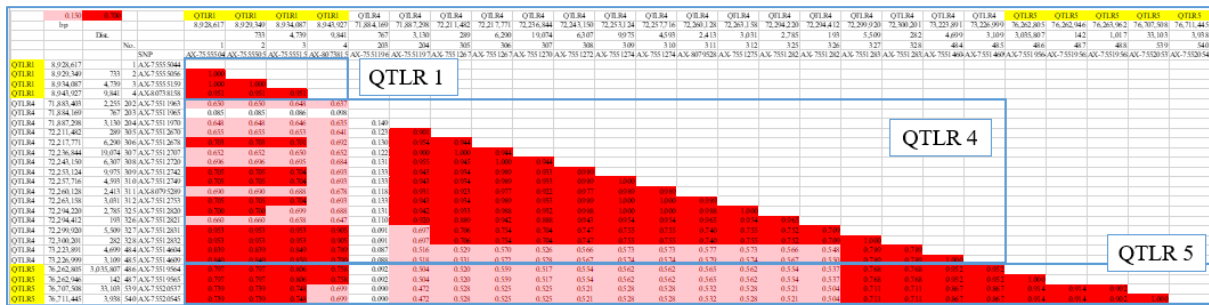

635  
 636 On Galgal4 there were over 62.2 Mb between QTLRs 1 and 4, and over 3.0 Mb  
 637 between 4 and 5. Nevertheless, very high to complete LD values were obtained. As  
 638 presented in the body of the paper, fragmented interdigitated LD blocks were found,  
 639 shown by the purple and white rows and columns interfering the red regions.

640 In light of these results we, LD together the entire 3 QTLRs in each 5 F<sub>6</sub> family.  
 641 Appendix Figure 2 present an examples of the analysis of the whole QTLRs, again in  
 642 Family 1. Similar results with some differences were found in all families.

643 Close examination of Appendix Figure 1 show 2 high LD blocks cover together all



644 QTLR 1, completely unlinked with one another (shown by the white rectangle below and  
 645 left to the upper left and the lower right red triangles). One of the QTLR 1 blocks is  
 646 fragmented, covering the start and the end of this QTLR.

647 The fragmented block of QTLR1 is completely linked with the start of QTLR 4, 62  
 648 Mb downstream. The second un-fragmented block of QTLR 1 has moderate to high LD  
 649 of  $0.15 \geq r^2 < 0.7$  with the fragmented interdigitated blocks of QTLRs 4 and 5.

650 **Appendix Figure 2. Galgal4.** Representative matrix of Family 1 of the entire QTLRs 1,  
 651 4 and 5 together. The entire matrix of 602 SNPs is too large to present, hence only a  
 652 sample of markers is presented to give a panoramic view of the LD pattern obtained.  
 653 Blued on the flanks, QTLRs 1 and 5 with yellowed QTLR 4 between them; blue frame,  
 654 QTLR; Text boxes present the boundaries of the QTLRs; Red, LD  $r^2 \geq 0.7$ ; purple,  $0.15 <$   
 655  $r^2 < 0.7$ .

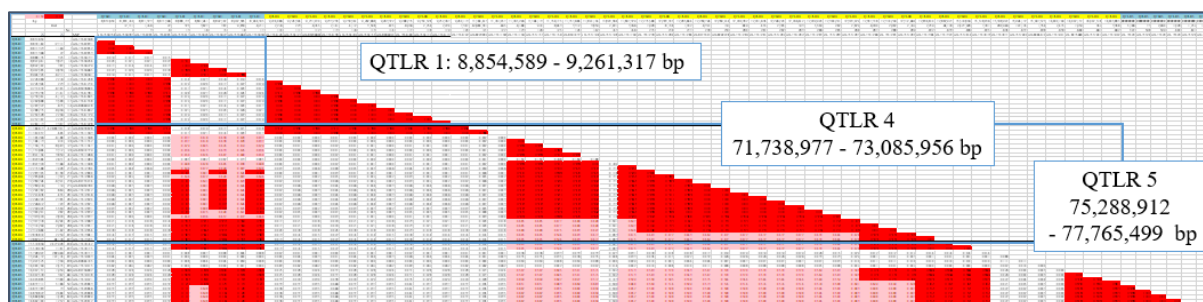

656

657 Moving from Galgal4 to Galgal6, more than 99% of the markers were mapped  
 658 successfully in Galgal6. Few hundreds markers were deleted in the new assembly, 0.3%  
 659 of the markers submitted to Lift. Very few markers even changed chromosomes.

660 After QTLR mapping as in Smith et al. (2020), the same 38 QTLRs reported by Smith  
 661 et al. (2020) were found. Nevertheless, lnrRNA01 that was located in QTLR 1 on  
 662 Galgal4 was located in QTLR 4 on Galgal6. Furthermore, Galgal6 completely eliminated  
 663 the LRLD between QTLR 1 and the other 2 QTLRs, and zeroed that 60 - 70 Mb high  
 664 LDs (Appendix Table 2).

665 **Table 4. Galgal6.** Distance distribution of high LD syntenic marker pairs randomized  
 666 within chromosomes.

| Distance (Mb) | Fam1   | Fam2  | Fam3  | Fam4  | Fam5   | All    |
|---------------|--------|-------|-------|-------|--------|--------|
| $\geq 20$     | 10,643 | 9,736 | 9,687 | 9,927 | 10,115 | 50,108 |

| Distance (Mb)       | Fam1     | Fam2     | Fam3     | Fam4     | Fam5     | All      |
|---------------------|----------|----------|----------|----------|----------|----------|
| >20 - ≥30           | 0        | 0        | 0        | 0        | 0        | 0        |
| >30 - ≥40           | 0        | 0        | 0        | 0        | 0        | 0        |
| >40 - ≥50           | 0        | 0        | 0        | 0        | 0        | 0        |
| >50 - ≥60           | 0        | 0        | 0        | 0        | 0        | 0        |
| >60 - ≥70           | 0        | 0        | 0        | 0        | 0        | 0        |
| <b>&gt;70 - ≥80</b> | <b>0</b> | <b>0</b> | <b>0</b> | <b>0</b> | <b>0</b> | <b>0</b> |
| >80 - ≥90           | 0        | 0        | 0        | 0        | 0        | 0        |
| >90 - ≥100          | 0        | 0        | 0        | 0        | 0        | 0        |
| >100 - ≥110         | 0        | 0        | 0        | 0        | 0        | 0        |
| >110 - ≥120         | 0        | 0        | 0        | 0        | 0        | 0        |
| >120 - ≥130         | 0        | 0        | 0        | 0        | 0        | 0        |
| >130 - ≥140         | 0        | 0        | 0        | 0        | 0        | 0        |
| >140 - ≥150         | 0        | 0        | 0        | 0        | 0        | 0        |
| >150 - ≥160         | 0        | 0        | 0        | 0        | 0        | 0        |
| >160 - ≥170         | 0        | 0        | 0        | 0        | 0        | 0        |
| >170 - ≥180         | 0        | 0        | 0        | 0        | 0        | 0        |
| >180 - ≥190         | 0        | 0        | 0        | 0        | 0        | 0        |
| >190 - ≥200         | 0        | 0        | 0        | 0        | 0        | 0        |
| Sum                 | 10,643   | 9,736    | 9,687    | 9,927    | 10,115   | 50,108   |

667

668

669

These results show the limitations of any genome build, and present the ability of LD analysis to find assembly errors.

1 **Complex and long-range linkage disequilibrium in chicken populations**

2 **Tables**

3 **Table 1.** Remapping Galgal4 QTLRs on Galgal6. QTLR, ordinal number of the QTLR  
 4 [Smith et al., 2020]; Chr, chromosome; Start/End, QTLR coordinates of the first and last  
 5 SNP in the QTLR; Length, size of the QTLR (bp).

| QTLR | Chr | Galgal4     |             |           | Galgal6     |             |           |
|------|-----|-------------|-------------|-----------|-------------|-------------|-----------|
|      |     | Start       | End         | Length    | Start       | End         | Length    |
| 1    | 1   | 8,854,589   | 9,261,317   | 406,729   | 9,510,148   | 9,902,036   | 391,889   |
| 2    | 1   | 13,268,810  | 14,294,877  | 1,026,068 | 13,994,599  | 14,950,768  | 956,170   |
| 3    | 1   | 52,012,381  | 52,517,953  | 505,573   | 52,166,588  | 52,643,244  | 476,657   |
| 4    | 1   | 71,738,977  | 73,085,956  | 1,346,980 | 71,892,917  | 73,277,481  | 1,384,565 |
| 5    | 1   | 75,288,912  | 77,765,499  | 2,476,588 | 75,513,671  | 79,029,197  | 3,515,527 |
| 6    | 1   | 91,482,501  | 91,803,475  | 320,975   | 93,533,567  | 93,853,587  | 320,021   |
| 7    | 1   | 101,761,945 | 104,477,713 | 2,715,769 | 103,738,415 | 106,416,920 | 2,678,506 |
| 8    | 1   | 109,395,871 | 110,913,451 | 1,517,581 | 111,372,866 | 112,400,685 | 1,027,820 |
| 9    | 1   | 169,656,958 | 172,228,091 | 2,571,134 | 171,680,812 | 174,306,953 | 2,626,142 |
| 10   | 1   | 174,394,951 | 175,634,386 | 1,239,436 | 176,474,702 | 177,748,402 | 1,273,701 |
| 11   | 1   | 194,193,118 | 194,788,548 | 595,431   | 196,152,404 | 196,750,875 | 598,472   |
| 12   | 2   | 15,960      | 883,257     | 867,298   | 48,621      | 959,053     | 910,433   |
| 13   | 2   | 46,423,161  | 46,868,789  | 445,629   | 45,786,534  | 46,247,754  | 461,221   |
| 14   | 2   | 105,493,833 | 108,988,920 | 3,495,088 | 105,791,822 | 109,334,178 | 3,542,357 |
| 15   | 2   | 125,168,753 | 127,089,304 | 1,920,552 | 125,532,963 | 127,219,187 | 1,686,225 |
| 16   | 2   | 138,767,830 | 139,701,774 | 933,945   | 139,198,404 | 140,160,087 | 961,684   |
| 17   | 3   | 108,220,206 | 109,260,649 | 1,040,444 | 108,593,746 | 109,643,999 | 1,050,254 |
| 18   | 4   | 8,308,498   | 11,268,107  | 2,959,610 | 8,328,709   | 11,309,259  | 2,980,551 |
| 19   | 4   | 84,393,173  | 88,579,400  | 4,186,228 | 84,829,085  | 89,057,374  | 4,228,290 |
| 20   | 5   | 7,568,851   | 8,147,837   | 578,987   | 8,388,371   | 8,967,466   | 579,096   |
| 21   | 5   | 18,806,924  | 19,673,354  | 866,431   | 19,753,005  | 20,610,009  | 857,005   |
| 22   | 6   | 2,077,640   | 2,709,412   | 631,773   | 3,323,132   | 3,946,659   | 623,528   |
| 23   | 6   | 29,536,109  | 29,817,337  | 281,229   | 30,954,349  | 31,233,344  | 278,996   |
| 24   | 6   | 31,006,769  | 31,448,342  | 441,574   | 32,440,880  | 32,888,648  | 447,769   |
| 25   | 7   | 13,062,871  | 16,436,053  | 3,373,183 | 13,563,779  | 16,986,311  | 3,422,533 |
| 26   | 10  | 22,643      | 1,713,384   | 1,690,742 | 1,025,523   | 2,668,959   | 1,643,437 |
| 27   | 11  | 7,397,790   | 8,440,259   | 1,042,470 | 7,912,510   | 8,959,749   | 1,047,240 |
| 28   | 12  | 8,996,686   | 9,432,693   | 436,008   | 9,414,714   | 9,845,036   | 430,323   |
| 29   | 13  | 10,363,430  | 12,176,727  | 1,813,298 | 11,756,937  | 13,566,822  | 1,809,886 |
| 30   | 14  | 8,085,563   | 9,335,685   | 1,250,123 | 8,499,374   | 9,745,708   | 1,246,335 |
| 31   | 14  | 13,138,194  | 15,087,518  | 1,949,325 | 13,542,085  | 15,384,231  | 1,842,147 |
| 32   | 16  | 1,630       | 490,907     | 489,278   | 1,852,095   | 2,669,032   | 816,938   |
| 33   | 17  | 3,442,598   | 5,634,042   | 2,191,445 | 3,808,082   | 5,932,858   | 2,124,777 |
| 34   | 18  | 3,196,488   | 4,093,129   | 896,642   | 3,221,049   | 4,118,252   | 897,204   |

| QTLR | Chr | Gagal4    |           |           | Galgal6   |           |           |
|------|-----|-----------|-----------|-----------|-----------|-----------|-----------|
|      |     | Start     | End       | Length    | Start     | End       | Length    |
| 35   | 24  | 4,489,675 | 5,514,833 | 1,025,159 | 4,160,414 | 5,498,172 | 1,337,759 |
| 36   | 26  | 4,378,168 | 5,036,699 | 658,532   | 4,438,584 | 5,002,302 | 563,719   |
| 37   | 27  | 1,540,112 | 2,270,461 | 730,350   | 3,930,559 | 4,689,821 | 759,263   |
| 38   | 28  | 1,282,726 | 1,571,011 | 288,286   | 1,447,725 | 1,687,264 | 239,540   |

6

7 **Table 2.** Summary statistics of non-syntenic random LD between 600K markers in the F<sub>6</sub>  
8 families. Pairs, number of pairs r<sup>2</sup> values obtained; Ind/pairs, average number of  
9 individuals used to calculate a markers pair LD in a family; r<sup>2</sup>: Avg, average; SD, standard  
10 deviation; Min, minimum; Max, maximum; All: Pairs, average number of pairs in all  
11 families combined; Ind/pairs r<sup>2</sup>, means weighted by the number of Pairs.

| Family | Pairs     | Ind/<br>pair | r <sup>2</sup> |       |       |       |
|--------|-----------|--------------|----------------|-------|-------|-------|
|        |           |              | Avg            | SD    | Min   | Max   |
| 1      | 190,232   | 176.6        | 0.014          | 0.019 | 0.000 | 0.368 |
| 2      | 182,366   | 231.7        | 0.012          | 0.016 | 0.000 | 0.991 |
| 3      | 184,399   | 354.0        | 0.008          | 0.011 | 0.000 | 0.372 |
| 4      | 187,406   | 219.5        | 0.010          | 0.014 | 0.000 | 0.246 |
| 5      | 178,780   | 200.7        | 0.012          | 0.016 | 0.000 | 0.243 |
| All    | 184,636.6 | 236.3        | 0.011          | 0.016 | 0.000 | 0.443 |

12

13

14 **Table 3.** Summary statistics of syntenic random LD between 600K markers in the F<sub>6</sub>  
 15 families. Pairs: No., number of pairs r<sup>2</sup> values obtained; Ind, average number of  
 16 individuals used to calculate a markers pair LD in a family; bp: average, minimum and  
 17 maximum bp between markers in a pair; r<sup>2</sup>: Avg, average; SD, standard deviation; Min,  
 18 minimum; Max, maximum; r(bp-r<sup>2</sup>), correlation between the distance and r<sup>2</sup> of a marker  
 19 pair; All: Pairs, total number of pairs in all families combines; Ind, bp and r<sup>2</sup>: means of  
 20 weighted by the number of pairs.

| Family:               |     | 1            | 2            | 3            | 4            | 5            | All           |
|-----------------------|-----|--------------|--------------|--------------|--------------|--------------|---------------|
| Pairs                 | No. | 207,770      | 200,411      | 200,866      | 204,453      | 195,323      | 1,008,823     |
|                       | Ind | 176.6        | 231.7        | 354.0        | 219.5        | 200.7        | 236.2         |
| bp                    | Avg | 28,745,980.9 | 30,164,000.4 | 28,092,640.5 | 29,039,387.5 | 28,844,817.9 | 28,976,195.6  |
|                       | Min | 11           | 11           | 40           | 64           | 165          | 57.3          |
|                       | Max | 196,356,451  | 197,038,449  | 196,167,202  | 196,407,037  | 196,676,774  | 196,526,525.6 |
| r <sup>2</sup>        | Avg | 0.119        | 0.112        | 0.109        | 0.110        | 0.119        | 0.114         |
|                       | SD  | 0.221        | 0.218        | 0.216        | 0.218        | 0.224        | 0.220         |
|                       | Min | 0.000        | 0.000        | 0.000        | 0.000        | 0.000        | 0.000         |
|                       | Max | 1.000        | 1.000        | 1.000        | 1.000        | 1.000        | 1.000         |
| r(bp-r <sup>2</sup> ) |     | -0.346       | -0.346       | -0.347       | -0.336       | -0.351       | -0.345        |

21

22

23 **Table 4.** Distribution of syntenic random LD values among the F<sub>6</sub> families. All, all  
 24 families combine;  $r^2 \geq$  (last 2 rows), frequencies of  $r^2$  above the indicated value.

| $r^2$               | Fam1   | Fam2   | Fam3   | Fam4   | Fam5   | All    |
|---------------------|--------|--------|--------|--------|--------|--------|
| $\leq 0.05$         | 0.6429 | 0.6778 | 0.6920 | 0.6920 | 0.6920 | 0.6707 |
| $>0.05 - \leq 0.10$ | 0.1036 | 0.0898 | 0.0757 | 0.0757 | 0.0757 | 0.0879 |
| $>0.10 - \leq 0.15$ | 0.0495 | 0.0451 | 0.0423 | 0.0423 | 0.0423 | 0.0457 |
| $>0.15 - \leq 0.20$ | 0.0351 | 0.0277 | 0.0292 | 0.0292 | 0.0292 | 0.0315 |
| $>0.20 - \leq 0.25$ | 0.0242 | 0.0192 | 0.0221 | 0.0221 | 0.0221 | 0.0219 |
| $>0.25 - \leq 0.30$ | 0.0180 | 0.0165 | 0.0171 | 0.0171 | 0.0171 | 0.0174 |
| $>0.30 - \leq 0.35$ | 0.0165 | 0.0138 | 0.0152 | 0.0152 | 0.0152 | 0.0152 |
| $>0.35 - \leq 0.40$ | 0.0120 | 0.0110 | 0.0120 | 0.0120 | 0.0120 | 0.0122 |
| $>0.40 - \leq 0.45$ | 0.0101 | 0.0101 | 0.0103 | 0.0103 | 0.0103 | 0.0102 |
| $>0.45 - \leq 0.50$ | 0.0094 | 0.0092 | 0.0081 | 0.0081 | 0.0081 | 0.0091 |
| $>0.50 - \leq 0.55$ | 0.0076 | 0.0087 | 0.0079 | 0.0079 | 0.0079 | 0.0080 |
| $>0.55 - \leq 0.60$ | 0.0064 | 0.0079 | 0.0064 | 0.0064 | 0.0064 | 0.0070 |
| $>0.60 - \leq 0.65$ | 0.0066 | 0.0076 | 0.0072 | 0.0072 | 0.0072 | 0.0069 |
| $>0.65 - \leq 0.70$ | 0.0067 | 0.0069 | 0.0062 | 0.0062 | 0.0062 | 0.0066 |
| $>0.70 - \leq 0.75$ | 0.0056 | 0.0070 | 0.0066 | 0.0066 | 0.0066 | 0.0062 |
| $>0.75 - \leq 0.80$ | 0.0061 | 0.0062 | 0.0063 | 0.0063 | 0.0063 | 0.0060 |
| $>0.80 - \leq 0.85$ | 0.0060 | 0.0063 | 0.0067 | 0.0067 | 0.0067 | 0.0063 |
| $>0.85 - \leq 0.90$ | 0.0074 | 0.0068 | 0.0065 | 0.0065 | 0.0065 | 0.0068 |
| $>0.90 - \leq 0.95$ | 0.0080 | 0.0073 | 0.0082 | 0.0082 | 0.0082 | 0.0081 |
| $>0.95 - \leq 1.00$ | 0.0180 | 0.0151 | 0.0139 | 0.0139 | 0.0139 | 0.0162 |
| Sum                 | 1.0000 | 1.0000 | 1.0000 | 1.0000 | 1.0000 | 1.0000 |
| $r^2 > 0.15$        | 0.2040 | 0.1872 | 0.1900 | 0.1886 | 0.2089 | 0.1957 |
| $r^2 > 0.70$        | 0.0512 | 0.0486 | 0.0482 | 0.0486 | 0.0518 | 0.0497 |

25

26

27 **Table 5.** Chromosomes and LRLDs in and between QTLRs. Number of F<sub>6</sub> array LRLDs  
 28 in and between QTLRs on the six chromosomes with more than one QTLR. Chr,  
 29 chromosome; Fam, family; All, All families combined; In QTLRs, LRLDs within the MD  
 30 QTLRs; Across QTLRs, LRLDs between QTLRs; Total, total number of LRLDs.

| LRLDs            | Chr | Fam1    | Fam2    | Fam3    | Fam4    | Fam5   | All     |
|------------------|-----|---------|---------|---------|---------|--------|---------|
| In<br>QTLRs      | 1   | 83,455  | 52,985  | 55,025  | 39,612  | 0      | 231,077 |
|                  | 2   | 15,854  | 5,195   | 0       | 0       | 0      | 21,049  |
|                  | 4   | 87,859  | 106,654 | 70,245  | 88,091  | 61,605 | 414,454 |
|                  | 5   | 0       | 0       | 0       | 0       | 0      | 0       |
|                  | 6   | 0       | 0       | 0       | 0       | 0      | 0       |
|                  | 14  | 503     | 511     | 489     | 116     | 151    | 1,770   |
|                  | Sum | 187,671 | 165,345 | 125,759 | 127,819 | 61,756 | 668,350 |
| Between<br>QTLRs | 1   | 39,244  | 54,674  | 33,243  | 33,937  | 321    | 161,419 |
|                  | 2   | 52      | 122     | 1       | 1       | 0      | 176     |
|                  | 4   | 26      | 35      | 24      | 33      | 22     | 140     |
|                  | 5   | 1       | 1       | 0       | 0       | 0      | 2       |
|                  | 6   | 2       | 2       | 2       | 2       | 0      | 8       |
|                  | 14  | 19      | 32      | 8       | 24      | 4      | 87      |
|                  | Sum | 39,344  | 54,866  | 33,278  | 33,997  | 347    | 161,832 |
| Total            | 1   | 122,699 | 107,659 | 88,268  | 73,549  | 321    | 392,496 |
|                  | 2   | 15,906  | 5,317   | 1       | 1       | 0      | 21,225  |
|                  | 4   | 87,885  | 106,689 | 70,269  | 88,124  | 61,627 | 414,594 |
|                  | 5   | 1       | 1       | 0       | 0       | 0      | 2       |
|                  | 6   | 2       | 2       | 2       | 2       | 0      | 8       |
|                  | 14  | 522     | 543     | 497     | 140     | 155    | 1,857   |
|                  | Sum | 227,015 | 220,211 | 159,037 | 161,816 | 62,103 | 830,182 |

31

32 **Table 6.** Genes and protein networks in QTLRs 4 and 5, ordered by location. Q, QTLR;  
 33 Start, End, genes' coordinated on Galgal6; Net, arbitrary number of a network seen in Figure  
 34 8, given by order of location of the first gene (not by order of appearance in Figure 8); Net  
 35 bolded, net comprise of genes from both QTLRs; B4-5, location in high LD blocks  
 36 extending over the two QTLRs in the five F<sub>6</sub> families.

| Q | Gene         | Start      | End        | Net      | B4-5 | Q | Gene       | Start      | End        | Net      | B4-5 |
|---|--------------|------------|------------|----------|------|---|------------|------------|------------|----------|------|
| 4 | DUSP16       | 71,872,763 | 71,904,322 | 1        | +    | 5 | ING4       | 77,734,990 | 77,749,769 |          | +    |
| 4 | CREBL2       | 71,960,834 | 71,970,851 | 1        | +    | 5 | ZNF384     | 77,755,770 | 77,781,779 |          | +    |
| 4 | GPR19        | 71,980,272 | 71,988,795 |          | +    | 5 | PIANP      | 77,803,621 | 77,808,412 |          | +    |
| 4 | CDKN1B       | 72,102,062 | 72,105,400 | 1        | +    | 5 | COPS7A     | 77,817,350 | 77,820,482 |          | +    |
| 4 | MRPS35       | 72,622,696 | 72,644,857 | 2        | +    | 5 | MLF2       | 77,831,588 | 77,841,435 | 5        | +    |
| 4 | MANSC4       | 72,649,269 | 72,664,039 |          | +    | 5 | PTMS       | 77,844,882 | 77,848,395 |          | +    |
| 4 | KLHL42       | 72,671,873 | 72,682,871 | <b>3</b> | +    | 5 | LAG3       | 77,862,795 | 77,868,711 | <b>2</b> | +    |
| 4 | PTHLH        | 72,752,038 | 72,764,874 | <b>2</b> | +    | 5 | CD4        | 77,873,930 | 77,885,897 | <b>2</b> | +    |
| 4 | CCDC91       | 72,867,675 | 73,073,035 |          | +    | 5 | GPR162     | 77,894,615 | 77,899,113 |          | +    |
| 4 | FAR2         | 73,191,857 | 73,320,608 |          |      | 5 | P3H3       | 77,900,316 | 77,910,271 |          | +    |
| 5 | SLC2A14      | 75,548,453 | 75,558,943 |          |      | 5 | GNB3       | 77,917,296 | 77,922,102 |          | +    |
| 5 | NANOG        | 75,593,243 | 75,596,024 | <b>2</b> |      | 5 | CDC43      | 77,922,769 | 77,924,912 | 5        | +    |
| 5 | AICDA        | 75,632,084 | 75,637,754 | <b>2</b> |      | 5 | USP5       | 77,924,975 | 77,939,984 | 5        | +    |
| 5 | MFAP5        | 75,647,640 | 75,660,701 | <b>2</b> |      | 5 | TPI1       | 77,940,005 | 77,943,711 | <b>2</b> | +    |
| 5 | RIMKLB       | 75,676,381 | 75,723,185 | <b>2</b> |      | 5 | LRRC23     | 77,945,286 | 77,949,479 |          | +    |
| 5 | PHC1         | 75,865,514 | 75,884,654 |          |      | 5 | ENO2       | 77,952,924 | 77,962,832 | <b>2</b> | +    |
| 5 | M6PR         | 75,883,096 | 75,891,432 | <b>2</b> |      | 5 | C1H12ORF57 | 77,991,895 | 77,993,033 |          | +    |
| 5 | OVST         | 76,362,509 | 76,397,638 |          |      | 5 | PTPN6      | 77,994,636 | 78,014,698 | <b>2</b> | +    |
| 5 | MAN1A2       | 77,147,561 | 77,281,468 |          | +    | 5 | PHB2       | 78,015,335 | 78,020,461 | <b>2</b> | +    |
| 5 | CD86         | 77,307,980 | 77,318,936 | <b>2</b> | +    | 5 | EMG1       | 78,020,566 | 78,022,842 | <b>2</b> | +    |
| 5 | CASR         | 77,388,128 | 77,429,662 | <b>2</b> | +    | 5 | LPCAT3     | 78,023,023 | 78,038,708 | 5        | +    |
| 5 | CSTB         | 77,433,979 | 77,438,548 | <b>2</b> | +    | 5 | C1S        | 78,045,961 | 78,055,022 | 4        |      |
| 5 | CSTA         | 77,439,994 | 77,445,026 |          | +    | 5 | C1R        | 78,058,485 | 78,065,761 | 4        |      |
| 5 | CCDC58       | 77,454,326 | 77,464,115 | <b>2</b> | +    | 5 | RBP5       | 78,070,071 | 78,071,702 |          |      |
| 5 | FAM162A      | 77,463,747 | 77,472,850 |          | +    | 5 | CLSTN3     | 78,071,723 | 78,086,627 | 5        |      |
| 5 | KPNA1        | 77,477,877 | 77,514,773 | <b>2</b> | +    | 5 | PEX5       | 78,099,886 | 78,110,916 | 5        |      |
| 5 | FBXO40       | 77,526,063 | 77,541,005 | <b>3</b> | +    | 5 | EPHA1      | 78,162,527 | 78,195,976 |          |      |
| 5 | TAPBPL       | 77,546,387 | 77,554,991 |          | +    | 5 | ZYX        | 78,201,045 | 78,212,460 | 5        |      |
| 5 | gga-mir-6553 | 77,567,295 | 77,567,395 |          | +    | 5 | FAM131B    | 78,257,533 | 78,259,472 |          |      |
| 5 | SCNN1A       | 77,568,659 | 77,576,825 |          | +    | 5 | CLCN1      | 78,276,084 | 78,333,916 |          |      |
| 5 | VAMP1        | 77,579,970 | 77,584,568 |          | +    | 5 | CASP2      | 78,336,971 | 78,362,958 |          |      |
| 5 | MRPL51       | 77,585,845 | 77,587,396 | <b>2</b> | +    | 5 | TMEM139    | 78,364,767 | 78,369,487 |          |      |
| 5 | NCAPD2       | 77,587,505 | 77,611,310 | 5        | +    | 5 | RAP1GAP1   | 78,380,088 | 78,418,997 |          |      |
| 5 | SCARNA10     | 77,588,152 | 77,588,472 |          | +    | 5 | GSTK1      | 78,425,057 | 78,436,557 | 5        |      |
| 5 | CNP1         | 77,615,840 | 77,617,557 |          | +    | 5 | TAS2R40    | 78,481,425 | 78,482,360 |          |      |
| 5 | GAPDH        | 77,619,214 | 77,623,350 | <b>2</b> | +    | 5 | TRPV6      | 78,604,630 | 78,633,785 | <b>2</b> |      |
| 5 | IFFO1        | 77,633,594 | 77,642,717 |          | +    | 5 | EPHB6      | 78,678,054 | 78,732,359 |          |      |
| 5 | NOP2         | 77,649,727 | 77,654,873 | <b>2</b> | +    | 5 | PRSS2      | 78,802,240 | 78,805,418 | <b>2</b> |      |
| 5 | LPAR5        | 77,694,435 | 77,702,350 | <b>2</b> | +    | 5 | PRSS3      | 78,879,681 | 78,923,402 | <b>2</b> |      |

37



## Complex and long-range linkage disequilibrium in chicken populations

### Figures

**Figure 1.** Distribution of random LRLDs over Chr 1 and overlaps with QTLRs (Table 1) in F<sub>6</sub> Family 1. Location of marker pairs plotted against  $r^2$ . Start, End, locations of the markers in a pair (for each Start dot there is a matched End dot; see Figure 2 for clarity); numbers, QTLR numbers (Table 1).

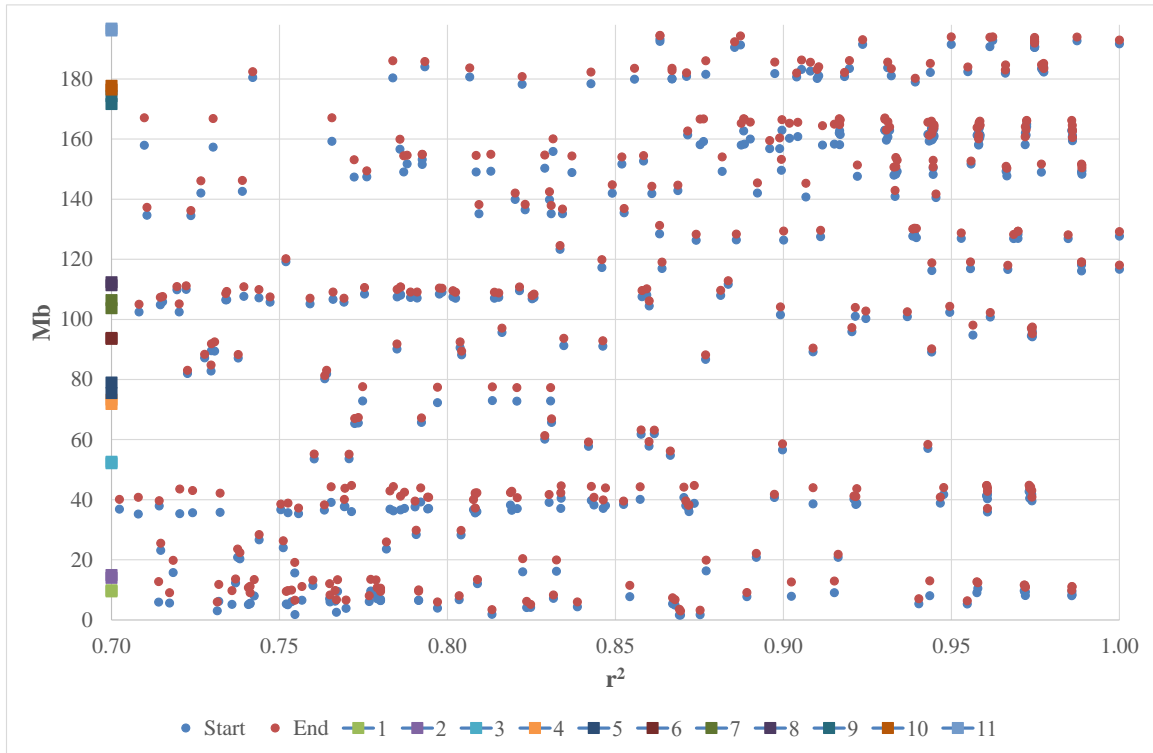

**Figure 2.** Overlaps between QTLs 4-5 and random LRLD in all F<sub>6</sub> families. Fam, family. There were 5 LRLDs in Family 1, 1 LRLD in Families 2 - 4, and 2 LRLDs in Family 5. Each series of an LRLD is composed of two circles connected by a single line; the circles represent the locations on the x-axis of 2 random markers constitute a pair, and the LD  $r^2$  of this pair is presented on the y-axis. There could be more than one LRLD in a family. Similarly, the series of QTLs 4 and 5 are presents by squares connected by a double line; the squares represent the locations of the QTL boundaries. QTLs do not have an  $r^2$  of course; they are simply presented on the x-axis, aligned with the LRLD.

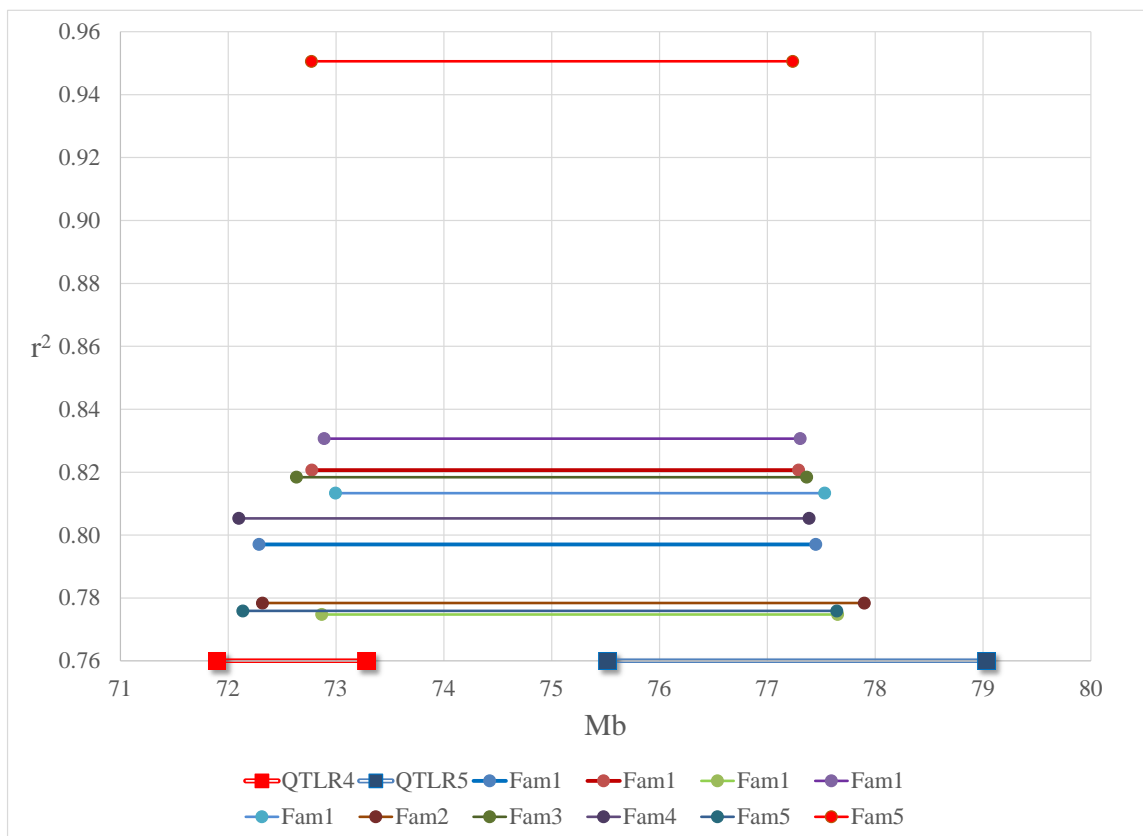

- 1 **Figure 3.** Fragmented interdigitated blocks in QTLR 2 on Chr 1 found in F<sub>6</sub> Family 1. B, block serial number ordered by the location
- 2 of the first marker, colored by block; Mb, location on Galgal6 in Mb; Dist., distance in Mb; ..., unrepresented intermediate markers;
- 3 No., serial number of the marker; red, LD  $r^2 \geq 0.7$ .
- 4 a. all blocks.

| B   |         |         | 1       | 1       | 1       | 1       | 1       | 1       | 1       | 1       | 2       | 1       | 2       | 1       | 1       | 1       | 1       | 3       | 1       | 2...    | 3          |         |          |
|-----|---------|---------|---------|---------|---------|---------|---------|---------|---------|---------|---------|---------|---------|---------|---------|---------|---------|---------|---------|---------|------------|---------|----------|
|     | Mb      |         | 14.0830 | 14.0859 | 14.0934 | 14.0947 | 14.1026 | 14.1041 | 14.1077 | 14.1134 | 14.1403 | 14.1441 | 14.1460 | 14.1461 | 14.1471 | 14.1507 | 14.1536 | 14.1544 | 14.1563 | 14.1613 | 14.1739... | 14.7193 |          |
|     |         | Dist.   |         | 0.00292 | 0.00745 | 0.00133 | 0.00784 | 0.00150 | 0.00368 | 0.00568 | 0.02691 | 0.00379 | 0.00191 | 0.00004 | 0.00107 | 0.00361 | 0.00287 | 0.00081 | 0.00191 | 0.00496 | 0.01255... | 0.54541 |          |
|     |         | No.     | 134     | 135     | 136     | 137     | 138     | 139     | 140     | 141     | 142     | 143     | 144     | 145     | 146     | 147     | 148     | 149     | 150     | 151     | 152...     | 337     |          |
| 1   | 14.0830 |         | 134     |         |         |         |         |         |         |         |         |         |         |         |         |         |         |         |         |         |            |         |          |
| 1   | 14.0859 | 0.00292 | 135     | 1.000   |         |         |         |         |         |         |         |         |         |         |         |         |         |         |         |         |            |         |          |
| 1   | 14.0934 | 0.00745 | 136     | 1.000   | 1.000   |         |         |         |         |         |         |         |         |         |         |         |         |         |         |         |            |         |          |
| 1   | 14.0947 | 0.00133 | 137     | 0.973   | 0.986   | 0.973   |         |         |         |         |         |         |         |         |         |         |         |         |         |         |            |         |          |
| 1   | 14.1026 | 0.00784 | 138     | 0.779   | 0.778   | 0.779   | 0.752   |         |         |         |         |         |         |         |         |         |         |         |         |         |            |         |          |
| 1   | 14.1041 | 0.00150 | 139     | 0.778   | 0.778   | 0.778   | 0.751   | 1.000   |         |         |         |         |         |         |         |         |         |         |         |         |            |         |          |
| 1   | 14.1077 | 0.00368 | 140     | 1.000   | 1.000   | 1.000   | 0.973   | 0.778   | 0.778   |         |         |         |         |         |         |         |         |         |         |         |            |         |          |
| 1   | 14.1134 | 0.00568 | 141     | 1.000   | 1.000   | 1.000   | 0.973   | 0.779   | 0.778   | 1.000   |         |         |         |         |         |         |         |         |         |         |            |         |          |
| 2   | 14.1403 | 0.02691 | 142     | 0.022   | 0.023   | 0.022   | 0.023   | 0.111   | 0.111   | 0.023   | 0.022   |         |         |         |         |         |         |         |         |         |            |         |          |
| 1   | 14.1441 | 0.00379 | 143     | 0.779   | 0.778   | 0.779   | 0.752   | 1.000   | 1.000   | 0.778   | 0.779   | 0.111   |         |         |         |         |         |         |         |         |            |         |          |
| 2   | 14.1460 | 0.00191 | 144     | 0.024   | 0.024   | 0.024   | 0.024   | 0.094   | 0.093   | 0.024   | 0.024   | 0.947   | 0.094   |         |         |         |         |         |         |         |            |         |          |
| 1   | 14.1461 | 0.00004 | 145     | 0.779   | 0.778   | 0.779   | 0.752   | 1.000   | 1.000   | 0.778   | 0.779   | 0.111   | 1.000   | 0.094   |         |         |         |         |         |         |            |         |          |
| 1   | 14.1471 | 0.00107 | 146     | 1.000   | 1.000   | 1.000   | 0.986   | 0.778   | 0.778   | 1.000   | 1.000   | 0.023   | 0.778   | 0.024   | 0.778   |         |         |         |         |         |            |         |          |
| 1   | 14.1507 | 0.00361 | 147     | 0.779   | 0.778   | 0.779   | 0.752   | 1.000   | 1.000   | 0.778   | 0.779   | 0.111   | 1.000   | 0.094   | 1.000   | 0.778   |         |         |         |         |            |         |          |
| 1   | 14.1536 | 0.00287 | 148     | 0.779   | 0.778   | 0.779   | 0.752   | 1.000   | 1.000   | 0.778   | 0.779   | 0.111   | 1.000   | 0.094   | 1.000   | 0.778   | 1.000   |         |         |         |            |         |          |
| 1   | 14.1544 | 0.00081 | 149     | 0.779   | 0.778   | 0.779   | 0.752   | 1.000   | 1.000   | 0.778   | 0.779   | 0.111   | 1.000   | 0.094   | 1.000   | 0.778   | 1.000   | 1.000   |         |         |            |         |          |
| 3   | 14.1563 | 0.00191 | 150     | 0.003   | 0.003   | 0.003   | 0.001   | 0.005   | 0.005   | 0.003   | 0.003   | 0.002   | 0.005   | 0.001   | 0.005   | 0.003   | 0.005   | 0.005   | 0.005   |         |            |         |          |
| 1   | 14.1613 | 0.00496 | 151     | 0.778   | 0.778   | 0.778   | 0.765   | 1.000   | 1.000   | 0.778   | 0.778   | 0.111   | 1.000   | 0.093   | 1.000   | 0.778   | 1.000   | 1.000   | 1.000   | 0.005   |            |         |          |
| 2   | 14.1739 | 0.01255 | 152     | 0.022   | 0.023   | 0.022   | 0.023   | 0.111   | 0.111   | 0.023   | 0.022   | 1.000   | 0.111   | 0.947   | 0.111   | 0.023   | 0.111   | 0.111   | 0.111   | 0.002   | 0.111      |         |          |
| ... | ...     | ...     | ...     | ...     | ...     | ...     | ...     | ...     | ...     | ...     | ...     | ...     | ...     | ...     | ...     | ...     | ...     | ...     | ...     | ...     | ...        | ...     | ...      |
| 3   | 14.7193 | 0.54541 | 337     | 0.000   | 0.000   | 0.000   | 0.002   | 0.000   | 0.000   | 0.000   | 0.000   | 0.001   | 0.000   | 0.001   | 0.000   | 0.000   | 0.000   | 0.000   | 0.000   | 0.000   | 1.000      | 0.000   | 0.001... |

5

6

7 b. Block 1. Blocks 2 and 3 omitted.

| B |         |         |     | 1       | 1       | 1       | 1       | 1       | 1       | 1       | 1       | 1       | 1       | 1       | 1       | 1       |         |         |
|---|---------|---------|-----|---------|---------|---------|---------|---------|---------|---------|---------|---------|---------|---------|---------|---------|---------|---------|
|   | Mb      |         |     | 14.0830 | 14.0859 | 14.0934 | 14.0947 | 14.1026 | 14.1041 | 14.1077 | 14.1134 | 14.1441 | 14.1461 | 14.1471 | 14.1507 | 14.1536 | 14.1544 | 14.1613 |
|   |         | Dist.   |     |         | 0.00292 | 0.00745 | 0.00133 | 0.00784 | 0.00150 | 0.00368 | 0.00568 | 0.03070 | 0.00195 | 0.00107 | 0.00361 | 0.00287 | 0.00081 | 0.00687 |
|   |         |         | No. | 134     | 135     | 136     | 137     | 138     | 139     | 140     | 141     | 143     | 145     | 146     | 147     | 148     | 149     | 151     |
| 1 | 14.0830 |         | 134 |         |         |         |         |         |         |         |         |         |         |         |         |         |         |         |
| 1 | 14.0859 | 0.00292 | 135 | 1.000   |         |         |         |         |         |         |         |         |         |         |         |         |         |         |
| 1 | 14.0934 | 0.00745 | 136 | 1.000   | 1.000   |         |         |         |         |         |         |         |         |         |         |         |         |         |
| 1 | 14.0947 | 0.00133 | 137 | 0.973   | 0.986   | 0.973   |         |         |         |         |         |         |         |         |         |         |         |         |
| 1 | 14.1026 | 0.00784 | 138 | 0.779   | 0.778   | 0.779   | 0.752   |         |         |         |         |         |         |         |         |         |         |         |
| 1 | 14.1041 | 0.00150 | 139 | 0.778   | 0.778   | 0.778   | 0.751   | 1.000   |         |         |         |         |         |         |         |         |         |         |
| 1 | 14.1077 | 0.00368 | 140 | 1.000   | 1.000   | 1.000   | 0.973   | 0.778   | 0.778   |         |         |         |         |         |         |         |         |         |
| 1 | 14.1134 | 0.00568 | 141 | 1.000   | 1.000   | 1.000   | 0.973   | 0.779   | 0.778   | 1.000   |         |         |         |         |         |         |         |         |
| 1 | 14.1441 | 0.03070 | 143 | 0.779   | 0.778   | 0.779   | 0.752   | 1.000   | 1.000   | 0.778   | 0.779   |         |         |         |         |         |         |         |
| 1 | 14.1461 | 0.00195 | 145 | 0.779   | 0.778   | 0.779   | 0.752   | 1.000   | 1.000   | 0.778   | 0.779   | 1.000   |         |         |         |         |         |         |
| 1 | 14.1471 | 0.00107 | 146 | 1.000   | 1.000   | 1.000   | 0.986   | 0.778   | 0.778   | 1.000   | 1.000   | 0.778   | 0.778   |         |         |         |         |         |
| 1 | 14.1507 | 0.00361 | 147 | 0.779   | 0.778   | 0.779   | 0.752   | 1.000   | 1.000   | 0.778   | 0.779   | 1.000   | 1.000   | 0.778   |         |         |         |         |
| 1 | 14.1536 | 0.00287 | 148 | 0.779   | 0.778   | 0.779   | 0.752   | 1.000   | 1.000   | 0.778   | 0.779   | 1.000   | 1.000   | 0.778   | 1.000   |         |         |         |
| 1 | 14.1544 | 0.00081 | 149 | 0.779   | 0.778   | 0.779   | 0.752   | 1.000   | 1.000   | 0.778   | 0.779   | 1.000   | 1.000   | 0.778   | 1.000   | 1.000   |         |         |
| 1 | 14.1613 | 0.00687 | 151 | 0.778   | 0.778   | 0.778   | 0.765   | 1.000   | 1.000   | 0.778   | 0.778   | 1.000   | 1.000   | 0.778   | 1.000   | 1.000   | 1.000   |         |

8

9 c. Block 2. Blocks 1 and 3 omitted.

| B |         |         |     | 2       | 2       | 2       |
|---|---------|---------|-----|---------|---------|---------|
|   | Mb      |         |     | 14.1403 | 14.1460 | 14.1739 |
|   |         | Dist.   |     |         | 0.00570 | 0.02783 |
|   |         |         | No. | 142     | 144     | 152     |
| 2 | 14.1403 |         | 142 |         |         |         |
| 2 | 14.1460 | 0.00570 | 144 | 0.947   |         |         |
| 2 | 14.1739 | 0.02783 | 152 | 1.000   | 0.947   |         |

10

11

12 d. Block 3. Blocks 1 and 2 omitted.

|   |         |         |     |         |         |
|---|---------|---------|-----|---------|---------|
| B |         |         |     | 3       | 3       |
|   | Mb      |         |     | 14.1563 | 14.7193 |
|   |         | Dist.   |     |         | 0.56293 |
|   |         |         | No. | 150     | 337     |
| 3 | 14.1563 |         | 150 |         |         |
| 3 | 14.7193 | 0.56293 | 337 | 1.000   |         |

13

14 **Figure 4.** LD within one QTLR gene. Line WL1, the gene TRANK1 in QTLR 13 on  
 15 chromosome 2. B, block serial number ordered by the location of the first marker (same  
 16 LD block have the same color); Mb, location on Galgal6 in Mb; Dist., distance in Mb;  
 17 Red,  $r^2 \geq 0.7$ ; similar P values has similar colors.

| B                   |         |        | 1       | 1       | 2       | 2       | 1       | 1       | 1       | 1       | 1       | 1       |
|---------------------|---------|--------|---------|---------|---------|---------|---------|---------|---------|---------|---------|---------|
|                     | Mb      |        | 45.9001 | 45.9006 | 45.9013 | 45.9021 | 45.9025 | 45.9151 | 45.9157 | 45.9188 | 45.9214 | 45.9359 |
|                     |         | Dist.  |         | 0.0005  | 0.0007  | 0.0008  | 0.0004  | 0.0126  | 0.0007  | 0.0031  | 0.0026  | 0.0145  |
|                     |         | No.    | 5       | 8       | 11      | 12      | 13      | 18      | 20      | 28      | 29      | 36      |
| 1                   | 45.9001 |        | 5       |         |         |         |         |         |         |         |         |         |
| 1                   | 45.9006 | 0.0005 | 8       | 0.895   |         |         |         |         |         |         |         |         |
| 2                   | 45.9013 | 0.0007 | 11      | 0.016   | 0.041   |         |         |         |         |         |         |         |
| 2                   | 45.9021 | 0.0008 | 12      | 0.016   | 0.041   | 1.000   |         |         |         |         |         |         |
| 1                   | 45.9025 | 0.0004 | 13      | 1.000   | 0.895   | 0.016   | 0.016   |         |         |         |         |         |
| 1                   | 45.9151 | 0.0126 | 18      | 1.000   | 0.895   | 0.016   | 0.016   | 1.000   |         |         |         |         |
| 1                   | 45.9157 | 0.0007 | 20      | 1.000   | 0.895   | 0.016   | 0.016   | 1.000   | 1.000   |         |         |         |
| 1                   | 45.9188 | 0.0031 | 28      | 1.000   | 0.895   | 0.016   | 0.016   | 1.000   | 1.000   | 1.000   |         |         |
| 1                   | 45.9214 | 0.0026 | 29      | 1.000   | 0.895   | 0.016   | 0.016   | 1.000   | 1.000   | 1.000   | 1.000   |         |
| 1                   | 45.9359 | 0.0145 | 36      | 0.895   | 1.000   | 0.041   | 0.041   | 0.895   | 0.895   | 0.895   | 0.895   | 0.895   |
| Association test P: |         |        | 3E-02   | 5E-02   | 5E-01   | 5E-01   | 3E-02   | 3E-02   | 3E-02   | 3E-02   | 3E-02   | 5E-02   |

18

19 **Figure 5.** LD blocks across QTLR elements. Line WL3, QTLR 3 on chromosome 1. B,  
 20 block serial number ordered by the location of the first marker (same LD block have the  
 21 same color); Mb, location on Galgal6 in Mb; Dist., distance in Mb; E, QTLR element  
 22 [Smith et al., 2020]; Red,  $r^2 \geq 0.7$ ; similar P values has similar colors.

| B                   |         |        | 1        | 1       | 1       | 2       | 2       | 2        | 2       | 1       | 2       | 2       | 2        | 1       | 1       | 2       | 2       | 2 | 2 |  |  |
|---------------------|---------|--------|----------|---------|---------|---------|---------|----------|---------|---------|---------|---------|----------|---------|---------|---------|---------|---|---|--|--|
|                     | Mb      |        | 52.2768  | 52.2769 | 52.2769 | 52.3375 | 52.3532 | 52.3826  | 52.4001 | 52.4082 | 52.4281 | 52.4684 | 52.4745  | 52.6418 | 52.6419 | 52.6422 | 52.6424 |   |   |  |  |
|                     |         | Dist.  |          | 0.0001  | 0.0000  | 0.0605  | 0.0157  | 0.0294   | 0.0175  | 0.0081  | 0.0199  | 0.0403  | 0.0060   | 0.1674  | 0.0001  | 0.0003  | 0.0002  |   |   |  |  |
|                     |         | E      | lncRNA02 |         |         |         |         | lncRNA05 |         |         |         |         | lncRNA04 |         |         |         |         |   |   |  |  |
|                     |         | No.    | 6        | 7       | 8       | 11      | 12      | 14       | 15      | 16      | 17      | 19      | 20       | 30      | 31      | 32      | 33      |   |   |  |  |
| 1                   | 52.2768 |        | 6        |         |         |         |         |          |         |         |         |         |          |         |         |         |         |   |   |  |  |
| 1                   | 52.2769 | 0.0001 | 7        | 1.000   |         |         |         |          |         |         |         |         |          |         |         |         |         |   |   |  |  |
| 1                   | 52.2769 | 0.0000 | 8        | 1.000   | 1.000   |         |         |          |         |         |         |         |          |         |         |         |         |   |   |  |  |
| 2                   | 52.3375 | 0.0605 | 11       | 0.006   | 0.006   | 0.006   |         |          |         |         |         |         |          |         |         |         |         |   |   |  |  |
| 2                   | 52.3532 | 0.0157 | 12       | 0.006   | 0.006   | 0.006   | 1.000   |          |         |         |         |         |          |         |         |         |         |   |   |  |  |
| 2                   | 52.3826 | 0.0294 | 14       | 0.016   | 0.016   | 0.016   | 0.959   | 0.959    |         |         |         |         |          |         |         |         |         |   |   |  |  |
| 1                   | 52.4001 | 0.0175 | 15       | 1.000   | 1.000   | 1.000   | 0.006   | 0.006    | 0.016   |         |         |         |          |         |         |         |         |   |   |  |  |
| 2                   | 52.4082 | 0.0081 | 16       | 0.016   | 0.016   | 0.016   | 0.958   | 0.958    | 0.998   | 0.016   |         |         |          |         |         |         |         |   |   |  |  |
| 2                   | 52.4281 | 0.0199 | 17       | 0.016   | 0.016   | 0.016   | 0.945   | 0.945    | 0.985   | 0.016   | 0.986   |         |          |         |         |         |         |   |   |  |  |
| 1                   | 52.4684 | 0.0403 | 19       | 1.000   | 1.000   | 1.000   | 0.006   | 0.006    | 0.016   | 1.000   | 0.016   | 0.016   |          |         |         |         |         |   |   |  |  |
| 1                   | 52.4745 | 0.0060 | 20       | 1.000   | 1.000   | 1.000   | 0.006   | 0.006    | 0.016   | 1.000   | 0.016   | 0.016   | 1.000    |         |         |         |         |   |   |  |  |
| 2                   | 52.6418 | 0.1674 | 30       | 0.015   | 0.015   | 0.015   | 0.921   | 0.921    | 0.960   | 0.015   | 0.961   | 0.978   | 0.015    | 0.015   |         |         |         |   |   |  |  |
| 2                   | 52.6419 | 0.0001 | 31       | 0.015   | 0.015   | 0.015   | 0.921   | 0.921    | 0.960   | 0.015   | 0.961   | 0.978   | 0.015    | 0.015   | 1.000   |         |         |   |   |  |  |
| 2                   | 52.6422 | 0.0003 | 32       | 0.015   | 0.015   | 0.015   | 0.921   | 0.921    | 0.960   | 0.015   | 0.961   | 0.978   | 0.015    | 0.015   | 1.000   | 1.000   |         |   |   |  |  |
| 2                   | 52.6424 | 0.0002 | 33       | 0.015   | 0.015   | 0.015   | 0.921   | 0.921    | 0.960   | 0.015   | 0.961   | 0.978   | 0.015    | 0.015   | 1.000   | 1.000   | 1.000   |   |   |  |  |
| Association test P: |         |        | 7E-01    | 7E-01   | 7E-01   | 1E-01   | 1E-01   | 2E-01    | 7E-01   | 2E-01   | 2E-01   | 7E-01   | 7E-01    | 3E-01   | 3E-01   | 3E-01   | 3E-01   |   |   |  |  |

23

24

25 **Figure 6.** LD between QTLR genes. Line WL2, QTLR 3 on chromosome 17. B, block  
 26 serial number ordered by the location of the first marker (same LD block have the same  
 27 color); Mb, location on Galgal6 in Mb; Dist., distance in Mb; E, QTLR element [Smith et  
 28 al., 2020]; Red,  $r^2 \geq 0.7$ ; purple,  $0.15 \leq r^2 < 0.7$ ; same LD block have the same color;  
 29 similar P values has similar colors.

| B                   |        | 1      | 2      | 2      | 2      | 2      | 2      | 2      | 2      | 1      | 1      |        |
|---------------------|--------|--------|--------|--------|--------|--------|--------|--------|--------|--------|--------|--------|
| Mb                  |        | 3.9390 | 3.9418 | 3.9420 | 3.9421 | 3.9428 | 3.9435 | 3.9443 | 3.9447 | 4.3588 | 4.3642 | 4.3689 |
|                     | Dist.  |        | 0.0029 | 0.0001 | 0.0001 | 0.0007 | 0.0008 | 0.0007 | 0.0005 | 0.4141 | 0.0054 | 0.0047 |
|                     | E      | TLR4   |        |        |        |        |        |        |        | BRINP1 |        |        |
|                     | No.    | 2      | 4      | 5      | 6      | 7      | 8      | 9      | 10     | 11     | 14     | 15     |
| 1                   | 3.9390 |        |        |        |        |        |        |        |        |        |        |        |
| 2                   | 3.9418 | 0.0029 |        |        |        |        |        |        |        |        |        |        |
| 2                   | 3.9420 | 0.0001 | 0.135  |        |        |        |        |        |        |        |        |        |
| 2                   | 3.9421 | 0.0001 | 0.135  | 1.000  |        |        |        |        |        |        |        |        |
| 2                   | 3.9428 | 0.0007 | 0.135  | 1.000  | 1.000  |        |        |        |        |        |        |        |
| 2                   | 3.9435 | 0.0008 | 0.135  | 1.000  | 1.000  | 1.000  |        |        |        |        |        |        |
| 2                   | 3.9443 | 0.0007 | 0.135  | 1.000  | 1.000  | 1.000  | 1.000  |        |        |        |        |        |
| 2                   | 3.9447 | 0.0005 | 0.135  | 1.000  | 1.000  | 1.000  | 1.000  | 1.000  |        |        |        |        |
| 1                   | 4.3588 | 0.4141 | 0.830  | 0.102  | 0.102  | 0.102  | 0.102  | 0.102  | 0.102  |        |        |        |
| 1                   | 4.3642 | 0.0054 | 0.830  | 0.102  | 0.102  | 0.102  | 0.102  | 0.102  | 0.102  | 1.000  |        |        |
|                     | 4.3689 | 0.0047 | 0.157  | 0.661  | 0.661  | 0.661  | 0.661  | 0.661  | 0.661  | 0.171  | 0.171  |        |
| Association test P: |        | 3E-01  | 7E-01  | 7E-01  | 7E-01  | 7E-01  | 7E-01  | 7E-01  | 7E-01  | 2E-01  | 2E-01  | 8E-01  |

30

31

32 **Figure 7.** LD between QTLRs 4 and 5. Line WPR1, the lncRNA01 in QTLR 4 and the  
 33 gene CSTA in QTLR 5. Q, QTLR serial number (Table 1); B, high LD block serial  
 34 number ordered by the location of the first marker (same LD block have the same color);  
 35 Mb, location on Galgal6 in Mb; Dist., distance in Mb; E, QTLR element [Smith et al.,  
 36 2020]; Red,  $r^2 \geq 0.7$ ; purple,  $0.15 \leq r^2 < 0.7$ ; same LD block have the same color; similar P  
 37 values has similar colors.

| Q                   |       |          | 4           | 4           | 4       | 4       | 5       | 5       | 5       |         |       |
|---------------------|-------|----------|-------------|-------------|---------|---------|---------|---------|---------|---------|-------|
| B                   |       |          | 1           | 1           | 1       | 1       | 2       | 2       | 2       |         |       |
|                     | Mb    |          |             | 72.3073     | 72.3074 | 72.3076 | 72.3076 | 77.4421 | 77.4449 | 77.4449 |       |
|                     | Dist. |          |             |             | 0.0001  | 0.0002  | 0.0000  | 5.1345  | 0.0028  | 0.0000  |       |
|                     |       | E        |             | lncRNA01.03 |         |         |         | CSTA    |         |         |       |
|                     |       |          |             | No.         | 34      | 36      | 37      | 38      | 42      | 44      | 45    |
| 4                   | 1     | 72.30728 | lncRNA01.03 | 34          |         |         |         |         |         |         |       |
| 4                   | 1     | 72.30737 |             | 36          | 1.000   |         |         |         |         |         |       |
| 4                   | 1     | 72.30762 |             | 37          | 1.000   | 1.000   |         |         |         |         |       |
| 4                   | 1     | 72.30763 |             | 38          | 1.000   | 1.000   | 1.000   |         |         |         |       |
| 5                   | 2     | 77.44215 | CSTA        | 42          | 0.478   | 0.478   | 0.478   | 0.478   |         |         |       |
| 5                   | 2     | 77.44490 |             | 44          | 0.478   | 0.478   | 0.478   | 0.478   | 1.000   |         |       |
| 5                   | 2     | 77.44493 |             | 45          | 0.478   | 0.478   | 0.478   | 0.478   | 1.000   | 1.000   |       |
| Association test P: |       |          |             |             | 8E-02   | 8E-02   | 8E-02   | 8E-02   | 4E-01   | 4E-01   | 4E-01 |

38

39



40 **Figure 8.** STRING network of genes under QTLRs 4 and 5. Network nodes represent  
41 proteins; Colored nodes, query proteins and first shell of interactors; Node content: empty,  
42 protein of unknown 3D structure; filled, some 3D structure is known or predicted; Known  
43 interactions: ; from curated databases; , experimentally determined;  
44 Predicted interactions: , gene neighborhood; , gene fusions; ,  
45 gene co-occurrence; Others: , text mining; , co-expression; ,  
46 protein homology. The number of the QTLR is shown next to the gene. As can be seen,  
47 some gene associations include genes across each QTLR.

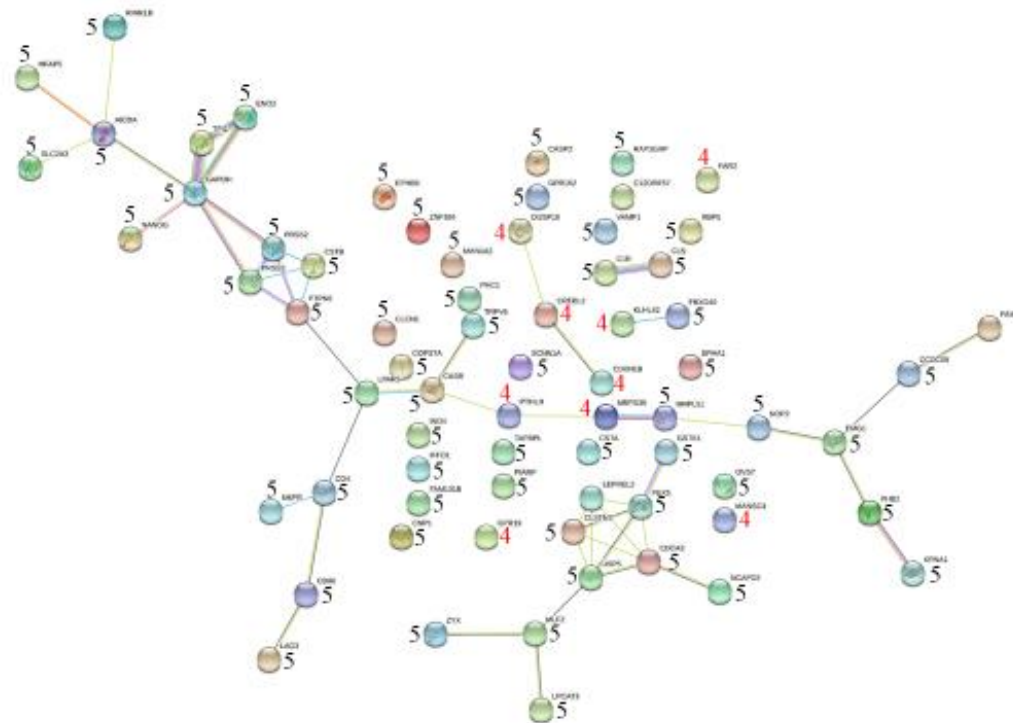

48

49
